# Supplementary material for: Quantifying the promise of lithium–air batteries for electric vehicles
Source: Royal Society of Chemistry journal article supplement (doi:10.1039/c3ee43870h), 2014-01-01
Supplement: c3ee43870h1.xlsx [file c3ee43870h1.xlsx]

## Sheet: About this model
This model is a modified version of BatPaC v2.2. The major modifications to BatPaC is the impedance calculation and sizing of components for oxygen or air utilization. This is an iterative model and thus requires the user to enable the iteration function within Excel. If one wishes to run the model for different cases (e.g. pack energy), we suggest changing the input in small increments until the…

## Sheet: About BatPaC
BatPaC (Battery Performance and Cost Model) SOFTWARE COPYRIGHT NOTIFICATION © COPYRIGHT 2011 UCHICAGO ARGONNE, LLC All rights reserved. The BatPaC, Version 2.0 and 1.0 software, manual and supporting documentation are protectable under copyright laws of the United States. NEITHER THE UNITED STATES GOVERNMENT NOR ANY AGENCY THEREOF, NOR THE UCHICAGO ARGONNE, LLC, NOR ANY OF THEIR EMPLOYEES, MAKES …

## Sheet: Chem
Cell Chemistry													LEAVE
				Selected									BLANK
				System	Default Values							Override
				Li2O2-Li		Li2O2-Li					Other	Values
Positive Electrode
moles of e- / mole of O2				2		2
Active material capacity, mAh/g:				1168		1168
Volume %			Electrode type	Open		Open
Active material				60		60
Carbon				8		8
Binder				2		2
Open porosity				5		5
Weight %
Active material				0
Carbon				0
Binder				0
Binder solvent				NMP		NMP
Electrolyte, Vol% %				25		25
Density, g/cm3
Active material				2.31		2.31
Carbon				1.825		1.825
Binder				1.77		1.77
Negative Electrode
N/P capacity ratio after formation				1.5		1.5
Active material capacity, mAh/g:				3861		3861
Weight %
Active material				100		100
Carbon				0		0
Binder				0		0
Binder solvent				NMP		NMP
Void, Vol% %				0		0
Density, g/cm3
Active material				0.53		0.53
Carbon				1.95		1.95
Binder				1.1		1.1
Positive Foil
Material				Aluminum		Aluminum
Thickness, mm				20		20
Negative Foil
Material				Copper		Copper
Thickness, mm				8		8
Separator
Thickness, mm				20		20
Void, Vol% %				0		0
Density, g/cm3				4		4
Electrolyte density, g/cm3				1.2		1.2
Cell Voltage and Resistance Parameters
OCV at 20% SOC , V				2.96		2.96
Open circuit voltage at 50% SOC, V				2.96		2.96
ORR kinetic prefactor				1		1
Electrolyte conductivity prefactor				0.01		0.01
Solid state diffusion limiting C-rate (10-s), A/Ah				100		100
Negative electrode cm2/cm3				10000000		10000000
Positive electrode cm2/cm3				50000		50000
Electrode system ASI for power, ohm-cm2
Selected ASI value				33
At 50% SOC, 2-sec burst				21		21
At 50% SOC, 10-sec burst				26.6		26.6
At 20% SOC range, 10-sec burst				33		33
ASI correction factor				3		3
Maximum allowable ASI for limiting capacity				49.5
Electrode system ASI for energy, ohm-cm2				58.52		58.52
Maximum electrode coating thickness, mm				200		200
Available battery energy, % of total
Selected % energy				85
microHEV and HEV-HP				25		25
PHEV				70		70
EV				85		85
Cell Materials Costs						Li2O2-Li						Override Values				carbon felt
Positive Electrode, $/kg				p								Cost	p			$/kg	g/cm3	volume fraction	$/m2
Active material			0	0.95		0										50	2	0.15	2.25
Carbon			50	1		50
Binder PVDF			10	1		10
Binder Solvent (NMP)			3.2	1		3.2
Negative electrode material, $/kg
Active Material			100	0.95		100
Carbon Black			6.8	1		6.8
Binder			10	1		10
Binder Solvent			0	1		0
Positive current collector foil, $/m2			0.8	1		0.8										ceramic
Negative current collector foil, $/m2			1.8	1		1.8										$/kg	g/cm3	t (um)	$/m2
Separators, $/m2			2	1		2										25	4	20	2
Electrolyte, $/L			21.6	1		21.6

## Sheet: Iterative I-V
Design cell to meet rated gross power at 80% of OCV at end of discharge
	check	1	1	1	1	1	1	0.811261	1	1	1		Calculate efficiency of C/5 discharge from cell design on left
Total pack energy	kWh	128	128	128	128	128	128	128	127	127	127		Total pack energy	kWh	128	128	128	128	128	128	128	127	127	127
Total pack power	kW	87.73	87.73	87.73	87.73	87.73	87.55	87.25	87.1	86.9	86.7		Total pack power	kW	87.73	87.73	87.73	87.73	87.73	87.55	87.25	87.1	86.9	86.7
Calculated pack power at V/U	kW	87.73	87.73	87.73	87.73	87.73	87.55	87.25	87.1	86.9	86.7
Number of cells		240	240	240	240	240	240	240	240	240	240		Number of cells		240	240	240	240	240	240	240	240	240	240
Pack area required	m2	1230.69	708.168	426.294	272.536	186.413	131.957	97.3513	85.412	66.2639	52.3822		Pack area required	m2	1230.69	708.168	426.294	272.536	186.413	131.957	97.3513	85.412	66.2639	52.3822
Thermodynamic cell voltage, U	V	2.96	2.96	2.96	2.96	2.96	2.96	2.96	2.96	2.96	2.96		Thermodynamic cell voltage, U	V	2.96	2.96	2.96	2.96	2.96	2.96	2.96	2.96	2.96	2.96
Cell area	cm2	51278.6	29507	17762.3	11355.7	7767.2	5498.19	4056.3	3558.83	2761	2182.59		Cell area	cm2	51278.6	29507	17762.3	11355.7	7767.2	5498.19	4056.3	3558.83	2761	2182.59
Number of layers per cell		104	60	36	24	16	12	10	8	6	6		Number of layers per cell		104	60	36	24	16	12	10	8	6	6
Layer area	cm2	493.063	491.784	493.396	473.152	485.45	458.183	500	444.854	460.166	363.766		Layer area	cm2	493.063	491.784	493.396	473.152	485.45	458.183	500	444.854	460.166	363.766
Cell voltage at rated power	V	2.368	2.368	2.368	2.368	2.368	2.368	2.368	2.368	2.368	2.368		Cell voltage at rated power	V	2.368	2.368	2.368	2.368	2.368	2.368	2.368	2.368	2.368	2.368
Calc cell voltage at rated power	V	2.368	2.368	2.368	2.368	2.368	2.368	2.368	2.368	2.368	2.368
Current at rated power	A/cm2	0.00301037	0.00523154	0.00869074	0.0135939	0.0198742	0.0280184	0.0378479	0.0430643	0.055381	0.0698962		Fraction of OCV at C/5	V/U	0.887343	0.889811	0.893379	0.89826	0.892548	0.892951	0.894317	0.905053	0.908124	0.911653
Calc current at rated power	A/cm2	0.00301037	0.00523154	0.00869074	0.0135939	0.0198742	0.0280184	0.0378479	0.0430643	0.055381	0.0698962		Calc cell voltage for energy	V	2.62654	2.63384	2.6444	2.65885	2.64194	2.64314	2.64718	2.67896	2.68805	2.69849
Current for energy, C/5	A/cm2	0.000791972	0.0013725	0.00227092	0.00353283	0.00519805	0.00733988	0.00993379	0.0111007	0.01426	0.0179692		Current for energy, C/5	A/cm2	0.000791972	0.0013725	0.00227092	0.00353283	0.00519805	0.00733988	0.00993379	0.0111007	0.01426	0.0179692
Specific capacity, C	mAh/cm2	3.95986	6.86252	11.3546	17.6641	25.9903	36.6994	49.669	55.5034	71.3	89.8459		Capacity, C	mAh/cm2	3.95986	6.86252	11.3546	17.6641	25.9903	36.6994	49.669	55.5034	71.3	89.8459
Cell capacity, Q	Ah	203.056	202.493	201.684	200.588	201.872	200.265	196.575	191.919	189.114	186.718		Cell capacity, Q	Ah	203.056	202.493	201.684	200.588	201.872	200.265	196.575	191.919	189.114	186.718
Iterate current (1 = yes, 0 = reset)		1	1	1	1	1	1	1	1	1	1
Iterate positive (1 = yes, 0 = reset)		1	1	1	1	1	1	1	1	1	1		Iterate positive (1 = yes, 0 = reset)		1	1	1	1	1	1	1	1	1	1
Warning													Warning
Impedance source	units												Impedance source	units
Lithium metal electrode	Electrodissolution/deposition between ceramic-buffer-layer and metal interface												Lithium metal electrode	Electrodissolution/deposition between ceramic-buffer-layer and metal interface
N:P ratio	mAh/mAh	1.5	1.5	1.5	1.5	1.5	1.5	1.5	1.5	1.5	1.5		N:P ratio	mAh/mAh	1.5	1.5	1.5	1.5	1.5	1.5	1.5	1.5	1.5	1.5
Thickness, L	cm	0.00290265	0.00503036	0.00832316	0.0129482	0.0190514	0.0269014	0.0364083	0.0406851	0.0522643	0.0658588		Thickness, L	cm	0.00290265	0.00503036	0.00832316	0.0129482	0.0190514	0.0269014	0.0364083	0.0406851	0.0522643	0.0658588
Kinetic model		Butler-Volmer	Butler-Volmer	Butler-Volmer	Butler-Volmer	Butler-Volmer	Butler-Volmer	Butler-Volmer	Butler-Volmer	Butler-Volmer	Butler-Volmer		Kinetic model		Butler-Volmer	Butler-Volmer	Butler-Volmer	Butler-Volmer	Butler-Volmer	Butler-Volmer	Butler-Volmer	Butler-Volmer	Butler-Volmer	Butler-Volmer
Exchange current, i0	A/cm2	0.0001	0.000145	0.00021025	0.000304862	0.000442051	0.000640973	0.000929411	0.00134765	0.00195409	0.00283343		Exchange current, i0	A/cm2	0.0001	0.000145	0.00021025	0.000304862	0.000442051	0.000640973	0.000929411	0.00134765	0.00195409	0.00283343
Transfer coefficent, a		0.5	0.5	0.5	0.5	0.5	0.5	0.5	0.5	0.5	0.5		Transfer coefficent, a		0.5	0.5	0.5	0.5	0.5	0.5	0.5	0.5	0.5	0.5
Surface overpotential, h	V	0.177851	0.18729	0.194382	0.198336	0.198766	0.197298	0.193603	0.180962	0.174708	0.167481		Surface overpotential, h	V	0.108877	0.117948	0.124709	0.128325	0.129078	0.127713	0.12417	0.110868	0.104745	0.0977134
ASI	Ohm cm2	59.0795	35.8001	22.3665	14.5901	10.0012	7.04174	5.11528	4.20212	3.15465	2.39614		ASI	Ohm cm2	137.476	85.9363	54.9155	36.3237	24.832	17.3999	12.4998	9.98754	7.34536	5.43783
Ceramic electrolyte	Conduction of Li+ through ceramic												Ceramic electrolyte	Conduction of Li+ through ceramic
Thickness	cm	0.002	0.002	0.002	0.002	0.002	0.002	0.002	0.002	0.002	0.002		Thickness	cm	0.002	0.002	0.002	0.002	0.002	0.002	0.002	0.002	0.002	0.002
Bulk ionic conductivity, k	S/cm	0.0001	0.00017	0.000289	0.0004913	0.00083521	0.00141986	0.00241376	0.00410339	0.00697576	0.0118588		Bulk ionic conductivity, k	S/cm	0.0001	0.00017	0.000289	0.0004913	0.00083521	0.00141986	0.00241376	0.00410339	0.00697576	0.0118588
Overpotential, h	V	0.0602073	0.0615476	0.0601435	0.0553383	0.047591	0.0394665	0.0313602	0.0209897	0.0158781	0.0117881		Overpotential, h	V	0.0158394	0.0161471	0.0157157	0.0143816	0.0124473	0.0103389	0.00823098	0.00541049	0.00408845	0.00303053
ASI	Ohm cm2	20	11.7647	6.92042	4.07083	2.39461	1.40859	0.828584	0.487402	0.286707	0.168651		ASI	Ohm cm2	20	11.7647	6.92042	4.07083	2.39461	1.40859	0.828584	0.487402	0.286707	0.168651
Ceramic intercalation kinetics	Charge transfer between liquid electroltye and solid ceramic electrolyte												Ceramic intercalation kinetics	Charge transfer between liquid electroltye and solid ceramic electrolyte
Kinetic model		Butler-Volmer	Butler-Volmer	Butler-Volmer	Butler-Volmer	Butler-Volmer	Butler-Volmer	Butler-Volmer	Butler-Volmer	Butler-Volmer	Butler-Volmer		Kinetic model		Butler-Volmer	Butler-Volmer	Butler-Volmer	Butler-Volmer	Butler-Volmer	Butler-Volmer	Butler-Volmer	Butler-Volmer	Butler-Volmer	Butler-Volmer
Exchange current, i0	A/cm2	0.0001	0.000145	0.00021025	0.000304862	0.000442051	0.000640973	0.000929411	0.00134765	0.00195409	0.00283343		Exchange current, i0	A/cm2	0.0001	0.000145	0.00021025	0.000304862	0.000442051	0.000640973	0.000929411	0.00134765	0.00195409	0.00283343
Transfer coefficent, a		0.5	0.5	0.5	0.5	0.5	0.5	0.5	0.5	0.5	0.5		Transfer coefficent, a		0.5	0.5	0.5	0.5	0.5	0.5	0.5	0.5	0.5	0.5
Overpotential, h	V	0.177851	0.18729	0.194382	0.198336	0.198766	0.197298	0.193603	0.180962	0.174708	0.167481		Overpotential, h	V	0.108877	0.117948	0.124709	0.128325	0.129078	0.127713	0.12417	0.110868	0.104745	0.0977134
ASI	Ohm cm2	59.0795	35.8001	22.3665	14.5901	10.0012	7.04174	5.11528	4.20212	3.15465	2.39614		ASI	Ohm cm2	137.476	85.9363	54.9155	36.3237	24.832	17.3999	12.4998	9.98754	7.34536	5.43783
Positive porous electrode	Carbon felt-like composite electrode material												Positive porous electrode	Compression resiliant carbon felt-like composite electrode material
Discharged volume fraction, e	mAh/cm3	2698.08	2698.08	2698.08	2698.08	2698.08	2698.08	2698.08	2698.08	2698.08	2698.08		Discharged volume fraction, e	mAh/cm3	2698.08	2698.08	2698.08	2698.08	2698.08	2698.08	2698.08	2698.08	2698.08	2698.08
Active material (product)	cm3/cm3	0.6	0.6	0.6	0.6	0.6	0.6	0.6	0.6	0.6	0.6		Active material (product)	cm3/cm3	0.6	0.6	0.6	0.6	0.6	0.6	0.6	0.6	0.6	0.6
Electrolyte	cm3/cm3	0.25	0.25	0.25	0.25	0.25	0.25	0.25	0.25	0.25	0.25		Electrolyte	cm3/cm3	0.25	0.25	0.25	0.25	0.25	0.25	0.25	0.25	0.25	0.25
Carbon felt/matrix	cm3/cm3	0.1	0.1	0.1	0.1	0.1	0.1	0.1	0.1	0.1	0.1		Carbon felt/matrix	cm3/cm3	0.1	0.1	0.1	0.1	0.1	0.1	0.1	0.1	0.1	0.1
Thickness, L	cm	0.0024461	0.00423914	0.00701401	0.0109116	0.0160548	0.0226701	0.0306817	0.0342857	0.0440437	0.0554999		Thickness, L	cm	0.0024461	0.00423914	0.00701401	0.0109116	0.0160548	0.0226701	0.0306817	0.0342857	0.0440437	0.0554999
Specific interfacial area, a	cm2/cm3	5000	5000	5000	5000	5000	5000	5000	5000	5000	5000		Specific interfacial area, a	cm2/cm3	5000	5000	5000	5000	5000	5000	5000	5000	5000	5000
Roughness factor	cm2/cm2	12.2305	21.1957	35.0701	54.5578	80.274	113.35	153.408	171.429	220.218	277.5		Roughness factor	cm2/cm2	12.2305	21.1957	35.0701	54.5578	80.274	113.35	153.408	171.429	220.218	277.5
Electrolyte conductivity, keff	S/cm	0.00125	0.00125	0.00125	0.00125	0.00125	0.00125	0.00125	0.00125	0.00125	0.00125		Electrolyte conductivity, keff	S/cm	0.00125	0.00125	0.00125	0.00125	0.00125	0.00125	0.00125	0.00125	0.00125	0.00125
Matrix conductivity, seff	S/cm	3.16228	3.16228	3.16228	3.16228	3.16228	3.16228	3.16228	3.16228	3.16228	3.16228		Matrix conductivity, seff	S/cm	3.16228	3.16228	3.16228	3.16228	3.16228	3.16228	3.16228	3.16228	3.16228	3.16228
Test for Tafel applicability		Use Tafel	Use Tafel	Use Tafel	Use Tafel	Use Tafel	Use Tafel	Use Tafel	Use Linear	Use Linear	Use Linear		Test for Tafel applicability		Use Tafel	Use Tafel	Use Tafel	Use Tafel	Use Linear	Use Linear	Use Linear	Use Linear	Use Linear	Use Linear
Newman and Tobias expression		Tafel kinetics	Tafel kinetics	Tafel kinetics	Tafel kinetics	Tafel kinetics	Tafel kinetics	Tafel kinetics	Tafel kinetics	Tafel kinetics	Tafel kinetics		Newman and Tobias expression		Tafel kinetics	Tafel kinetics	Tafel kinetics	Tafel kinetics	Tafel kinetics	Tafel kinetics	Tafel kinetics	Tafel kinetics	Tafel kinetics	Tafel kinetics
Exchange current, i0	A/cm2	1e-05	1.7e-05	2.89e-05	4.913e-05	8.3521e-05	0.000141986	0.000241376	0.000410339	0.000697576	0.00118588		Exchange current, i0	A/cm2	1e-05	1.7e-05	2.89e-05	4.913e-05	8.3521e-05	0.000141986	0.000241376	0.000410339	0.000697576	0.00118588
Transfer coefficent, a		0.5	0.5	0.5	0.5	0.5	0.5	0.5	0.5	0.5	0.5		Transfer coefficent, a		0.5	0.5	0.5	0.5	0.5	0.5	0.5	0.5	0.5	0.5
(1-a)F/RT, b	1/V	19.1494	19.1494	19.1494	19.1494	19.1494	19.1494	19.1494	19.1494	19.1494	19.1494		(1-a)F/RT, b	1/V	19.1494	19.1494	19.1494	19.1494	19.1494	19.1494	19.1494	19.1494	19.1494	19.1494
Dimensionless current, d	N/A	0.112852	0.33988	0.934203	2.27325	4.89005	9.73451	17.7967	22.6281	37.382	59.4516		Dimensionless current, d	N/A	0.0296894	0.089168	0.244111	0.590781	1.27898	2.55012	4.67102	5.83284	9.62544	15.284
Epsilon, e	N/A	0.112808	0.339745	0.933834	2.27235	4.88812	9.73066	17.7896	22.6192	37.3672	59.4281		Epsilon, e	N/A	0.0296776	0.0891328	0.244014	0.590548	1.27847	2.54911	4.66918	5.83054	9.62164	15.278
theta iterate, q	radians	0.235334	0.400932	0.634611	0.90089	1.13641	1.30937	1.41547	4.3465	4.47876	4.5626	1.5708	theta iterate, q	radians	0.121538	0.209595	0.342422	0.518172	0.723792	0.937264	1.1232	1.18553	1.30698	1.39264
placeholder, tan( q )	N/A	0.239776	0.423892	0.736201	1.26246	2.15547	3.73764	6.38617	2.61001	4.20215	6.62613		placeholder, tan( q )	N/A	0.12214	0.212719	0.356465	0.570137	0.883799	1.3614	2.0829	2.46591	3.70215	5.55346
tan( q )	N/A	0.239776	0.423892	0.736201	1.26246	2.15547	3.73764	6.38618	2.61001	4.20215	6.62619		tan( q )	N/A	0.12214	0.212719	0.356465	0.570137	0.883799	1.3614	2.0829	2.46591	3.70215	5.5535
Si, y	N/A	0.235239	0.400764	0.63432	0.900391	1.13556	1.3079	1.41299	1.20388	1.33552	1.41844		Si, y	N/A	0.12149	0.209511	0.342282	0.517946	0.723443	0.936727	1.12237	1.18456	1.30552	1.39047
Overpotential, h= f1(L)-f2(0)	V	0.169222	0.145435	0.127074	0.116934	0.113678	0.115348	0.116845	#NUM!	#NUM!	#NUM!		Overpotential, h= f1(L)-f2(0)	V	0.0980643	0.0713776	0.0462771	0.0241262	0.00642163	-0.00574738	-0.0135215	-0.0324943	-0.0382565	-0.0437297
Euler and Nonnenmacher expression		Linear kinetics	Linear kinetics	Linear kinetics	Linear kinetics	Linear kinetics	Linear kinetics	Linear kinetics	Linear kinetics	Linear kinetics	Linear kinetics		Euler and Nonnenmacher expression		Linear kinetics	Linear kinetics	Linear kinetics	Linear kinetics	Linear kinetics	Linear kinetics	Linear kinetics	Linear kinetics	Linear kinetics	Linear kinetics
Dimnsnlss. current density,u	N/A	0.0957646	0.216388	0.466817	0.946872	1.81649	3.34431	5.90143	8.59836	14.4016	23.6616		Dimnsnlss. current density,u	N/A	0.0957646	0.216388	0.466817	0.946872	1.81649	3.34431	5.90143	8.59836	14.4016	23.6616
Overpotential, h= f1(L)-f2(0)	V	0.644569	0.384953	0.239898	0.1698	0.148236	0.152471	0.157726	0.137787	0.136213	0.132332		Overpotential, h= f1(L)-f2(0)	V	0.169574	0.100993	0.0626863	0.0441283	0.0387706	0.0399422	0.0413977	0.0355172	0.0350733	0.0340203
ASI for porous electrode	Ohm cm2	56.2129	27.7997	14.6217	8.602	5.71989	4.11687	3.08723	3.19956	2.45956	1.89326		ASI for porous electrode	Ohm cm2	123.823	52.0054	20.3781	6.82915	7.45868	5.4418	4.16736	3.19956	2.45956	1.89326
Current collector													Current collector
Overpotential, h	V	0.00686889	0.0104373	0.0160192	0.0230561	0.0331993	0.0425889	0.0565891	0.0713004	0.0904935	0.112918		Overpotential, h	V	0.00180708	0.00273824	0.00418587	0.00599191	0.00868318	0.0111569	0.0148527	0.0183791	0.0233011	0.0290293
ASI	Ohm cm2	2.28175	1.99507	1.84325	1.69607	1.67047	1.52003	1.49517	1.65567	1.63402	1.6155		ASI	Ohm cm2	2.28175	1.99507	1.84325	1.69607	1.67047	1.52003	1.49517	1.65567	1.63402	1.6155
Rated Power, 2C pulse													Rated Energy, C/3 discharge
Total cell ASI	Ohm cm2	196.654	113.16	68.1185	43.5491	29.7873	21.129	15.6415	13.7469	10.6896	8.46969		Total cell ASI	Ohm cm2	421.056	237.638	138.973	85.2434	61.1877	43.1701	31.4906	25.3177	19.071	14.5531
Total overpotential	V	0.592	0.592	0.592	0.592	0.592	0.592	0.592	0.592	0.592	0.591999		Total overpotential	V	0.333465	0.326159	0.315597	0.30115	0.318057	0.316864	0.312821	0.281044	0.271953	0.261507
Overpotential as function of cell region
												max tpe
	1	0	0	0	0	0	0	0	0	0	0	max tpe
	1	0.177851	0.18729	0.194382	0.198336	0.198766	0.190365	0.169951	0.150999	0.131114	0.111508	max tpe
	2	0.238058	0.248837	0.254525	0.253674	0.246357	0.224919	0.189871	0.1628	0.137967	0.115494	max tpe
	2	0.41591	0.436127	0.448907	0.45201	0.445122	0.415283	0.359822	0.313799	0.269081	0.227002	max tpe
	2	0.585131	0.581563	0.575981	0.568944	0.558801	0.518544	0.433436	0.391162	0.327693	0.271484	max tpe
	3	0.585131	0.581563	0.575981	0.568944	0.558801	0.518544	0.433436	0.391162	0.327693	0.271484	max tpe
	3	0.592	0.592	0.592	0.592	0.592	0.555832	0.469382	0.431248	0.366753	0.309667	max tpe
Cell Capacity Parameters Inputs From Battery Design
Positive electrode capacity, Ah/cm3		1.61885	1.61885	1.61885	1.61885	1.61885	1.61885	1.61885	1.61885	1.61885	1.61885
Negative electrode capacity, Ah/cm3		2.04633	2.04633	2.04633	2.04633	2.04633	2.04633	2.04633	2.04633	2.04633	2.04633
Negative-to-positive capacity ratio after formation		1.5	1.5	1.5	1.5	1.5	1.5	1.5	1.5	1.5	1.5
Maximum allowable positive electrode coating thickness	mm	200	200	200	200	200	200	200	200	200	200
Electrode Thickness and Area Results
Negative-to-positive electrode thickness ratio		1.18665	1.18665	1.18665	1.18665	1.18665	1.18665	1.18665	1.18665	1.18665	1.18665
Positive electrode thickness	mm	24.461	42.3914	70.1401	109.116	160.548	224.998	299.358	333.123	423.109	528.455
Negative electrode thickness	mm	29.0265	50.3036	83.2316	129.482	190.514	266.993	355.233	395.299	502.081	627.09
Positive electrode thickness at adjusted % OCV	mm	24.461	42.3914	70.1401	109.116	160.548	200	200	200	200	200
Negative electrode thickness at adjusted % OCV	mm	29.0265	50.3036	83.2316	129.482	190.514	237.329	237.329	237.329	237.329	237.329
Cell area, cm2	cm2	51278.6	29507	17762.3	11355.7	7767.2	6185.42	6071.44	5927.64	5841.02	5767.01
Layer area, Alayer	cm2	493.063	491.784	493.396	473.152	485.45	441.815	433.674	493.97	486.751	480.584
Number of layers per cell, Nlayer		104	60	36	24	16	14	14	12	12	12
Pack area, m2	m2	1230.69	708.168	426.294	272.536	186.413	148.45	145.715	142.263	140.184	138.408
Ip	A/cm2	0.00301037	0.00523154	0.00869074	0.0135939	0.0198742	0.0245308	0.0240412	0.0242113	0.0239043	0.023635
Vp	V	2.368	2.368	2.368	2.368	2.368	2.40417	2.49062	2.52875	2.59325	2.65033
Ve	V	2.62654	2.63384	2.6444	2.65885	2.64194	2.66314	2.71313	2.75724	2.79813	2.83404
ASIp	Ohm cm2	196.654	113.16	68.1185	43.5491	29.7873	22.6586	19.5241	17.8118	15.3426	13.102
ASIe	Ohm cm2	421.056	237.638	138.973	85.2434	61.1877	45.8445	38.1239	31.3125	24.9977	19.4525
Vp/U		0.8	0.8	0.8	0.8	0.8	0.812219	0.841425	0.854308	0.876097	0.895383
Fraction of OCV at C/5 (Ve/U)		0.887343	0.889811	0.893379	0.89826	0.892548	0.899709	0.916599	0.9315	0.945314	0.957445
Check		OK	OK	OK	OK	OK	THICKNESS-LIM	THICKNESS-LIM	THICKNESS-LIM	THICKNESS-LIM	THICKNESS-LIM

## Sheet: IV-thickness
Design cell to meet rated gross power at defined cell area
	check	1	1	1	1	1	1	1	1	1	1		Calculate efficiency of C/5 discharge from cell design on left
Total pack energy	kWh	128	128	128	128	128	128	128	127	127	127		Total pack energy	kWh	128	128	128	128	128	128	128	127	127	127
Total pack power	kW	87.73	87.73	87.73	87.73	87.73	87.55	87.25	87.1	86.9	86.7		Total pack power	kW	87.73	87.73	87.73	87.73	87.73	87.55	87.25	87.1	86.9	86.7
Calculated pack power at V/U	kW	87.73	87.73	87.73	87.73	87.73	87.55	87.25	87.1	86.9	86.7
Number of cells		240	240	240	240	240	240	240	240	240	240		Number of cells		240	240	240	240	240	240	240	240	240	240
Pack area required	m2	1230.69	708.168	426.294	272.536	186.413	148.45	145.715	142.263	140.184	138.408		Pack area required	m2	1230.69	708.168	426.294	272.536	186.413	148.45	145.715	142.263	140.184	138.408
Thermodynamic cell voltage, U	V	2.96	2.96	2.96	2.96	2.96	2.96	2.96	2.96	2.96	2.96		Thermodynamic cell voltage, U	V	2.96	2.96	2.96	2.96	2.96	2.96	2.96	2.96	2.96	2.96
Cell area	cm2	51278.6	29507	17762.3	11355.7	7767.2	6185.42	6071.44	5927.64	5841.02	5767.01		Cell area	cm2	51278.6	29507	17762.3	11355.7	7767.2	6185.42	6071.44	5927.64	5841.02	5767.01
Number of layers per cell		104	60	36	24	16	14	14	12	12	12		Number of layers per cell		104	60	36	24	16	14	14	12	12	12
Layer area	cm2	493.063	491.784	493.396	473.152	485.45	441.815	433.674	493.97	486.751	480.584		Layer area	cm2	493.063	491.784	493.396	473.152	485.45	441.815	433.674	493.97	486.751	480.584
Cell voltage at rated power	V	2.368	2.368	2.368	2.368	2.368	2.40417	2.49062	2.52875	2.59325	2.65033		Cell voltage at rated power	V	2.368	2.368	2.368	2.368	2.368	2.40417	2.49062	2.52875	2.59325	2.65033
Calc cell voltage at rated power	V												Cell voltage fo energy		2.62654	2.63384	2.6444	2.65885	2.64194	2.66314	2.71313	2.75724	2.79813	2.83404
Current at rated power	A/cm2	0.00301037	0.00523154	0.00869074	0.0135939	0.0198742	0.0245308	0.0240412	0.0242113	0.0239043	0.023635		Fraction of OCV at C/5	V/U	0.887343	0.889811	0.893379	0.89826	0.892548	0.899709	0.916599	0.9315	0.945314	0.957445
Calc current at rated power	A/cm2	0.00301037	0.00523154	0.00869074	0.0135939	0.0198742	0.0245308	0.0240412	0.0242113	0.0239043	0.023635		Calc cell voltage for energy	V	2.62654	2.63384	2.6444	2.65885	2.64194	2.66314	2.71313	2.75724	2.79813	2.83404
Current for energy, C/5	A/cm2	0.000791972	0.0013725	0.00227092	0.00353283	0.00519805	0.00647539	0.00647539	0.00647539	0.00647539	0.00647539		Current for energy, C/5	A/cm2	0.000791972	0.0013725	0.00227092	0.00353283	0.00519805	0.00647539	0.00647539	0.00647539	0.00647539	0.00647539
Specific capacity, C	mAh/cm2	3.95986	6.86252	11.3546	17.6641	25.9903	32.377	32.377	32.377	32.377	32.377		Capacity, C	mAh/cm2	3.95986	6.86252	11.3546	17.6641	25.9903	32.377	32.377	32.377	32.377	32.377
Cell capacity, Q	Ah	203.056	202.493	201.684	200.588	201.872	200.265	196.575	191.919	189.114	186.718		Cell capacity, Q	Ah	203.056	202.493	201.684	200.588	201.872	200.265	196.575	191.919	189.114	186.718
Iterate current (1 = yes, 0 = reset)		1	1	1	1	1	1	1	1	1	1
Iterate positive (1 = yes, 0 = reset)		1	1	1	1	1	1	1	1	1	1		Iterate positive (1 = yes, 0 = reset)		1	1	1	1	1	1	1	1	1	1
Warning													Warning
Impedance source	units												Impedance source	units
Lithium metal electrode	Electrodissolution/deposition between ceramic-buffer-layer and metal interface												Lithium metal electrode	Electrodissolution/deposition between ceramic-buffer-layer and metal interface
N:P ratio	mAh/mAh	1.5	1.5	1.5	1.5	1.5	1.5	1.5	1.5	1.5	1.5		N:P ratio	mAh/mAh	1.5	1.5	1.5	1.5	1.5	1.5	1.5	1.5	1.5	1.5
Thickness, L	cm	0.00290265	0.00503036	0.00832316	0.0129482	0.0190514	0.0237329	0.0237329	0.0237329	0.0237329	0.0237329		Thickness, L	cm	0.00290265	0.00503036	0.00832316	0.0129482	0.0190514	0.0237329	0.0237329	0.0237329	0.0237329	0.0237329
Kinetic model		Butler-Volmer	Butler-Volmer	Butler-Volmer	Butler-Volmer	Butler-Volmer	Butler-Volmer	Butler-Volmer	Butler-Volmer	Butler-Volmer	Butler-Volmer		Kinetic model		Butler-Volmer	Butler-Volmer	Butler-Volmer	Butler-Volmer	Butler-Volmer	Butler-Volmer	Butler-Volmer	Butler-Volmer	Butler-Volmer	Butler-Volmer
Exchange current, i0	A/cm2	0.0001	0.000145	0.00021025	0.000304862	0.000442051	0.000640973	0.000929411	0.00134765	0.00195409	0.00283343		Exchange current, i0	A/cm2	0.0001	0.000145	0.00021025	0.000304862	0.000442051	0.000640973	0.000929411	0.00134765	0.00195409	0.00283343
Transfer coefficent, a		0.5	0.5	0.5	0.5	0.5	0.5	0.5	0.5	0.5	0.5		Transfer coefficent, a		0.5	0.5	0.5	0.5	0.5	0.5	0.5	0.5	0.5	0.5
Surface overpotential, h	V	0.177851	0.18729	0.194382	0.198336	0.198766	0.190365	0.169951	0.150999	0.131114	0.111508		Surface overpotential, h	V	0.108877	0.117948	0.124709	0.128325	0.129078	0.121279	0.102416	0.084096	0.0667775	0.0511113
ASI	Ohm cm2	59.0795	35.8001	22.3665	14.5901	10.0012	7.76024	7.06916	6.2367	5.48494	4.71791		ASI	Ohm cm2	137.476	85.9363	54.9155	36.3237	24.832	18.7293	15.8162	12.987	10.3125	7.89316
Ceramic electrolyte	Conduction of Li+ through ceramic												Ceramic electrolyte	Conduction of Li+ through ceramic
Thickness	cm	0.002	0.002	0.002	0.002	0.002	0.002	0.002	0.002	0.002	0.002		Thickness	cm	0.002	0.002	0.002	0.002	0.002	0.002	0.002	0.002	0.002	0.002
Bulk ionic conductivity, k	S/cm	0.0001	0.00017	0.000289	0.0004913	0.00083521	0.00141986	0.00241376	0.00410339	0.00697576	0.0118588		Bulk ionic conductivity, k	S/cm	0.0001	0.00017	0.000289	0.0004913	0.00083521	0.00141986	0.00241376	0.00410339	0.00697576	0.0118588
Overpotential, h	V	0.0602073	0.0615476	0.0601435	0.0553383	0.047591	0.0345539	0.0199201	0.0118007	0.00685354	0.00398608		Overpotential, h	V	0.0158394	0.0161471	0.0157157	0.0143816	0.0124473	0.00912119	0.00536541	0.00315612	0.00185654	0.00109208
ASI	Ohm cm2	20	11.7647	6.92042	4.07083	2.39461	1.40859	0.828584	0.487402	0.286707	0.168651		ASI	Ohm cm2	20	11.7647	6.92042	4.07083	2.39461	1.40859	0.828584	0.487402	0.286707	0.168651
Ceramic intercalation kinetics	Charge transfer between liquid electroltye and solid ceramic electrolyte												Ceramic intercalation kinetics	Charge transfer between liquid electroltye and solid ceramic electrolyte
Kinetic model		Butler-Volmer	Butler-Volmer	Butler-Volmer	Butler-Volmer	Butler-Volmer	Butler-Volmer	Butler-Volmer	Butler-Volmer	Butler-Volmer	Butler-Volmer		Kinetic model		Butler-Volmer	Butler-Volmer	Butler-Volmer	Butler-Volmer	Butler-Volmer	Butler-Volmer	Butler-Volmer	Butler-Volmer	Butler-Volmer	Butler-Volmer
Exchange current, i0	A/cm2	0.0001	0.000145	0.00021025	0.000304862	0.000442051	0.000640973	0.000929411	0.00134765	0.00195409	0.00283343		Exchange current, i0	A/cm2	0.0001	0.000145	0.00021025	0.000304862	0.000442051	0.000640973	0.000929411	0.00134765	0.00195409	0.00283343
Transfer coefficent, a		0.5	0.5	0.5	0.5	0.5	0.5	0.5	0.5	0.5	0.5		Transfer coefficent, a		0.5	0.5	0.5	0.5	0.5	0.5	0.5	0.5	0.5	0.5
Overpotential, h	V	0.177851	0.18729	0.194382	0.198336	0.198766	0.190365	0.169951	0.150999	0.131114	0.111508		Overpotential, h	V	0.108877	0.117948	0.124709	0.128325	0.129078	0.121279	0.102416	0.084096	0.0667775	0.0511113
ASI	Ohm cm2	59.0795	35.8001	22.3665	14.5901	10.0012	7.76024	7.06916	6.2367	5.48494	4.71791		ASI	Ohm cm2	137.476	85.9363	54.9155	36.3237	24.832	18.7293	15.8162	12.987	10.3125	7.89316
Positive porous electrode	Compression resiliant carbon felt-like composite electrode material												Positive porous electrode	Compression resiliant carbon felt-like composite electrode material
Discharged volume fraction, e	mAh/cm3	2698.08	2698.08	2698.08	2698.08	2698.08	2698.08	2698.08	2698.08	2698.08	2698.08		Discharged volume fraction, e	mAh/cm3	2698.08	2698.08	2698.08	2698.08	2698.08	2698.08	2698.08	2698.08	2698.08	2698.08
Active material (product)	cm3/cm3	0.6	0.6	0.6	0.6	0.6	0.6	0.6	0.6	0.6	0.6		Active material (product)	cm3/cm3	0.6	0.6	0.6	0.6	0.6	0.6	0.6	0.6	0.6	0.6
Electrolyte	cm3/cm3	0.25	0.25	0.25	0.25	0.25	0.25	0.25	0.25	0.25	0.25		Electrolyte	cm3/cm3	0.25	0.25	0.25	0.25	0.25	0.25	0.25	0.25	0.25	0.25
Carbon felt/matrix	cm3/cm3	0.1	0.1	0.1	0.1	0.1	0.1	0.1	0.1	0.1	0.1		Carbon felt/matrix	cm3/cm3	0.1	0.1	0.1	0.1	0.1	0.1	0.1	0.1	0.1	0.1
Thickness, L	cm	0.0024461	0.00423914	0.00701401	0.0109116	0.0160548	0.02	0.02	0.02	0.02	0.02		Thickness, L	cm	0.0024461	0.00423914	0.00701401	0.0109116	0.0160548	0.02	0.02	0.02	0.02	0.02
Specific interfacial area, a	cm2/cm3	5000	5000	5000	5000	5000	5000	5000	5000	5000	5000		Specific interfacial area, a	cm2/cm3	5000	5000	5000	5000	5000	5000	5000	5000	5000	5000
Roughness factor	cm2/cm2	12.2305	21.1957	35.0701	54.5578	80.274	100	100	100	100	100		Roughness factor	cm2/cm2	12.2305	21.1957	35.0701	54.5578	80.274	100	100	100	100	100
Electrolyte conductivity, keff	S/cm	0.00125	0.00125	0.00125	0.00125	0.00125	0.00125	0.00125	0.00125	0.00125	0.00125		Electrolyte conductivity, keff	S/cm	0.00125	0.00125	0.00125	0.00125	0.00125	0.00125	0.00125	0.00125	0.00125	0.00125
Matrix conductivity, seff	S/cm	3.16228	3.16228	3.16228	3.16228	3.16228	3.16228	3.16228	3.16228	3.16228	3.16228		Matrix conductivity, seff	S/cm	3.16228	3.16228	3.16228	3.16228	3.16228	3.16228	3.16228	3.16228	3.16228	3.16228
Test for Tafel applicability		Use Tafel	Use Tafel	Use Tafel	Use Tafel	Use Tafel	Use Tafel	Use Tafel	Use Linear	Use Linear	Use Linear		Test for Tafel applicability		Use Tafel	Use Tafel	Use Tafel	Use Tafel	Use Linear	Use Linear	Use Linear	Use Linear	Use Linear	Use Linear
Newman and Tobias expression		Tafel kinetics	Tafel kinetics	Tafel kinetics	Tafel kinetics	Tafel kinetics	Tafel kinetics	Tafel kinetics	Tafel kinetics	Tafel kinetics	Tafel kinetics		Newman and Tobias expression		Tafel kinetics	Tafel kinetics	Tafel kinetics	Tafel kinetics	Tafel kinetics	Tafel kinetics	Tafel kinetics	Tafel kinetics	Tafel kinetics	Tafel kinetics
Exchange current, i0	A/cm2	1e-05	1.7e-05	2.89e-05	4.913e-05	8.3521e-05	0.000141986	0.000241376	0.000410339	0.000697576	0.00118588		Exchange current, i0	A/cm2	1e-05	1.7e-05	2.89e-05	4.913e-05	8.3521e-05	0.000141986	0.000241376	0.000410339	0.000697576	0.00118588
Transfer coefficent, a		0.5	0.5	0.5	0.5	0.5	0.5	0.5	0.5	0.5	0.5		Transfer coefficent, a		0.5	0.5	0.5	0.5	0.5	0.5	0.5	0.5	0.5	0.5
(1-a)F/RT, b	1/V	19.1494	19.1494	19.1494	19.1494	19.1494	19.1494	19.1494	19.1494	19.1494	19.1494		(1-a)F/RT, b	1/V	19.1494	19.1494	19.1494	19.1494	19.1494	19.1494	19.1494	19.1494	19.1494	19.1494
Dimensionless current, d	N/A	0.112852	0.33988	0.934203	2.27325	4.89005	7.51898	7.36891	7.42107	7.32696	7.24443		Dimensionless current, d	N/A	0.0296894	0.089168	0.244111	0.590781	1.27898	1.98479	1.98479	1.98479	1.98479	1.98479
Epsilon, e	N/A	0.112808	0.339745	0.933834	2.27235	4.88812	7.51601	7.366	7.41814	7.32407	7.24157		Epsilon, e	N/A	0.0296776	0.0891328	0.244014	0.590548	1.27847	1.984	1.984	1.984	1.984	1.984
theta iterate, q	radians	0.235334	0.400932	0.634611	0.90089	1.13641	1.2507	1.24579	1.24752	1.24439	1.2416	1.5708	theta iterate, q	radians	0.121538	0.209595	0.342422	0.518172	0.723792	0.858103	0.858103	0.858103	0.858103	0.858103
placeholder, tan( q )	N/A	0.239776	0.423892	0.736201	1.26246	2.15547	3.01666	2.96777	2.98477	2.9541	2.92721		placeholder, tan( q )	N/A	0.12214	0.212719	0.356465	0.570137	0.883799	1.15711	1.15711	1.15711	1.15711	1.15711
tan( q )	N/A	0.239776	0.423892	0.736201	1.26246	2.15547	3.01666	2.96777	2.98477	2.9541	2.92721		tan( q )	N/A	0.12214	0.212719	0.356465	0.570137	0.883799	1.15711	1.15711	1.15711	1.15711	1.15711
Si, y	N/A	0.235239	0.400764	0.63432	0.900391	1.13556	1.24952	1.24462	1.24634	1.24323	1.24045		Si, y	N/A	0.12149	0.209511	0.342282	0.517946	0.723443	0.857646	0.857646	0.857646	0.857646	0.857646
Overpotential, h= f1(L)-f2(0)	V	0.169222	0.145435	0.127074	0.116934	0.113678	0.103261	0.0736142	0.0465815	0.017647	-0.0111483		Overpotential, h= f1(L)-f2(0)	V	0.0980643	0.0713776	0.0462771	0.0241262	0.00642163	-0.0122451	-0.039955	-0.0676648	-0.0953747	-0.123085
Euler and Nonnenmacher expression		Linear kinetics	Linear kinetics	Linear kinetics	Linear kinetics	Linear kinetics	Linear kinetics	Linear kinetics	Linear kinetics	Linear kinetics	Linear kinetics		Euler and Nonnenmacher expression		Linear kinetics	Linear kinetics	Linear kinetics	Linear kinetics	Linear kinetics	Linear kinetics	Linear kinetics	Linear kinetics	Linear kinetics	Linear kinetics
Dimnsnlss. current density,u	N/A	0.0957646	0.216388	0.466817	0.946872	1.81649	2.95042	3.84688	5.01571	6.53969	8.52671		Dimnsnlss. current density,u	N/A	0.0957646	0.216388	0.466817	0.946872	1.81649	2.95042	3.84688	5.01571	6.53969	8.52671
Overpotential, h= f1(L)-f2(0)	V	0.644569	0.384953	0.239898	0.1698	0.148236	0.133873	0.100199	0.0773638	0.0586127	0.0444821		Overpotential, h= f1(L)-f2(0)	V	0.169574	0.100993	0.0626863	0.0441283	0.0387706	0.0353385	0.0269883	0.0206912	0.0158775	0.0121869
ASI for porous electrode	Ohm cm2	56.2129	27.7997	14.6217	8.602	5.71989	4.20944	3.06201	3.19535	2.45197	1.88204		ASI for porous electrode	Ohm cm2	123.823	52.0054	20.3781	6.82915	7.45868	5.45735	4.16783	3.19535	2.45197	1.88204
Current collector													Current collector
Overpotential, h	V	0.00686889	0.0104373	0.0160192	0.0230561	0.0331993	0.0372876	0.0359456	0.0400861	0.0390601	0.0381825		Overpotential, h	V	0.00180708	0.00273824	0.00418587	0.00599191	0.00868318	0.00984281	0.00968181	0.0107211	0.0105809	0.010461
ASI	Ohm cm2	2.28175	1.99507	1.84325	1.69607	1.67047	1.52003	1.49517	1.65567	1.63402	1.6155		ASI	Ohm cm2	2.28175	1.99507	1.84325	1.69607	1.67047	1.52003	1.49517	1.65567	1.63402	1.6155
Rated Power, 2C pulse													Rated Energy, C/3 discharge
Total cell ASI	Ohm cm2	196.654	113.16	68.1185	43.5491	29.7873	22.6586	19.5241	17.8118	15.3426	13.102		Total cell ASI	Ohm cm2	421.056	237.638	138.973	85.2434	61.1877	45.8445	38.1239	31.3125	24.9977	19.4525
Total overpotential	V	0.592	0.592	0.592	0.592	0.592	0.555832	0.469382	0.431248	0.366753	0.309667		Total overpotential	V	0.333465	0.326159	0.315597	0.30115	0.318057	0.296861	0.246867	0.20276	0.16187	0.125963
Overpotential as function of cell region
	1	0	0	0	0	0	0	0	0	0	0
	1	0.177851	0.18729	0.194382	0.198336	0.198766	0.190365	0.169951	0.150999	0.131114	0.111508
	2	0.238058	0.248837	0.254525	0.253674	0.246357	0.224919	0.189871	0.1628	0.137967	0.115494
	2	0.41591	0.436127	0.448907	0.45201	0.445122	0.415283	0.359822	0.313799	0.269081	0.227002
	2	0.585131	0.581563	0.575981	0.568944	0.558801	0.518544	0.433436	0.391162	0.327693	0.271484
	3	0.585131	0.581563	0.575981	0.568944	0.558801	0.518544	0.433436	0.391162	0.327693	0.271484
	3	0.592	0.592	0.592	0.592	0.592	0.555832	0.469382	0.431248	0.366753	0.309667

## Sheet: Flow and System
System
Constants
Ru	(J/molK)	8.314	8.314	8.314	8.314	8.314	8.314	8.314	8.314	8.314	8.314
F	(A-s/e-mol)	96485	96485	96485	96485	96485	96485	96485	96485	96485	96485
n	(e-mol/O2-mol)	2	2	2	2	2	2	2	2	2	2
XO2	(O2/air mol)	0.21	0.21	0.21	0.21	0.21	0.21	0.21	0.21	0.21	0.21
Inputs
Power - net	(kW)	80	80	80	80	80	80	80	80	80	80
Energy Total	(kWhr)	128	128	128	128	128	128	128	127	127	127
Energy Useable	(kWhr)	100.177	100.201	100.235	100.282	100.227	100.295	100.467	99.762	99.8928	99.9986
delta SOC	(%)	85	85	85	85	85	85	85	85	85	85
Power - net, average	(kW)	20	20	20	20	20	20	20	20	20	20
P compressor/PSA	(kPa)	300	300	300	300	300	300	300	300	300	300
P battery	(kPa)	300	300	300	300	300	300	300	300	300	300
T amb	(C)	20	20	20	20	20	20	20	20	20	20
T battery	(C)	30	30	30	30	30	30	30	30	30	30
Stoich		1.5	1.5	1.5	1.5	1.5	1.5	1.5	1.5	1.5	1.5
		input	input	input	input	input	input	input	input	input	input
Parasitic Power - peak	(kW)	7.72666	7.72666	7.72666	7.72666	7.72666	7.5948	7.30607	7.18352	6.98878	6.82251
match	(kW)	7.73	7.73	7.73	7.73	7.73	7.55	7.25	7.1	6.9	6.7
Parasitic Power - average	(kW)	1.72465	1.71987	1.713	1.70369	1.7146	1.70095	1.66653	1.6376	1.61144	1.59028
match	(kW)	1.72	1.72	1.72	1.72	1.72	1.72	1.68	1.65	1.62	1.61
Outputs (for other sections)
Power - max gross	(kW)	87.73	87.73	87.73	87.73	87.73	87.55	87.25	87.1	86.9	86.7
Power - ave gross	(kW)	21.72	21.72	21.72	21.72	21.72	21.72	21.68	21.65	21.62	21.61
Energy - provided	(kWhr)	108.8	108.8	108.8	108.8	108.8	108.8	108.8	107.95	107.95	107.95
Energy - EC	(kWhr)	136.623	136.599	136.565	136.518	136.573	136.505	136.333	135.188	135.057	134.951
Current Collectors
Inputs
(-) thickness	(um)	8	8	8	8	8	8	8	8	8	8
(+) thickness	(um)	20	20	20	20	20	20	20	20	20	20
Flow Field
Inputs
Iterate (1 = yes, 0 = reset)		1	1	1	1	1	1	1	1	1	1
Target pressure drop	(kPa)	30	30	30	30	30	30	30	30	30	30
Aspect Ratio	(length/width)	1	1	1	1	1	1	1	1	1	1
Depth per layer (iterated)	(um) - 1/2 stamping depth or DM thickness	15.3101	18.0197	20.9975	23.7421	26.8569	27.8513	27.5269	28.6793	28.4418	28.2354
Depth per layer hold		15.3101	18.0197	20.9975	23.7421	26.8569	27.8513	27.5269	28.6793	28.4418	28.2354
DM Darcy	(10^-12 m2)	10	10	10	10	10	10	10	10	10	10
DM Aerial weight	(g/m2)	70	70	70	70	70	70	70	70	70	70
DM cost	($/m2)	20	20	20	20	20	20	20	20	20	20
Flow Field type	(stamped or DM)	stamped	stamped	stamped	stamped	stamped	stamped	stamped	stamped	stamped	stamped
air viscosity	(Pa-s)	1.8e-05	1.8e-05	1.8e-05	1.8e-05	1.8e-05	1.8e-05	1.8e-05	1.8e-05	1.8e-05	1.8e-05
calcs
O2 in	(mol/s/footprint)	1.15378e-05	1.99989e-05	3.33314e-05	4.99972e-05	7.49958e-05	8.42468e-05	8.10439e-05	9.29653e-05	9.04451e-05	8.82933e-05
O2 out	(mol/s/footprint)	3.84594e-06	6.66629e-06	1.11105e-05	1.66657e-05	2.49986e-05	2.80823e-05	2.70146e-05	3.09884e-05	3.01484e-05	2.94311e-05
N2	(mol/s/footprint)	4.34041e-05	7.52338e-05	0.00012539	0.000188085	0.000282127	0.000316928	0.000304879	0.000349727	0.000340246	0.000332151
mol flow average	(mol/s/footprint)	5.1096e-05	8.85664e-05	0.000147611	0.000221416	0.000332124	0.000373093	0.000358909	0.000411704	0.000400542	0.000391013
vol flow	(m3/s)	4.2906e-07	7.43705e-07	1.23951e-06	1.85926e-06	2.78889e-06	3.13291e-06	3.01381e-06	3.45713e-06	3.36341e-06	3.28339e-06
Dh	(m)	3.06202e-05	3.60394e-05	4.19949e-05	4.74842e-05	5.37138e-05	5.57026e-05	5.50538e-05	5.73586e-05	5.68835e-05	5.64707e-05
dP stamped	(kPa)	30	30	30	30	30	30	30	30	30	30
dP DM	(kPa)	53.1705	78.309	111.997	148.736	197.097	214.036	208.431	228.696	224.439	220.773
Total DM area	(m2)	1297.19	746.489	449.324	287.571	196.566	156.925	154.111	149.945	147.809	145.985
W	(cm)	22.205	22.1762	22.2125	21.7521	22.0329	21.0194	20.8248	22.2254	22.0624	21.9222
L	(cm)	22.205	22.1762	22.2125	21.7521	22.0329	21.0194	20.8248	22.2254	22.0624	21.9222
Wcc/W		1.6049	1.64311	1.67739	1.70363	1.72868	1.73581	1.73352	1.74146	1.73987	1.73846
Packaging
Inputs
Seal	(mm)	6	6	6	6	6	6	6	6	6	6
Current Collectors	(mm)	12	12	12	12	12	12	12	12	12	12
Tabs	(mm)	15	15	15	15	15	15	15	15	15	15
Pouch	(mm)	0.1	0.1	0.1	0.1	0.1	0.1	0.1	0.1	0.1	0.1
Air Headers (and gap)	(mm)	50	50	50	50	50	50	50	50	50	50
Coolant Headers (and gap)	(mm)	20	20	20	20	20	20	20	20	20	20
calcs
layer thickness	(mm)	0.112798	0.154715	0.218369	0.306339	0.421919	0.509181	0.508856	0.510009	0.509771	0.509565
Total Volume Flow	(m3/s)	0.0115154	0.0115154	0.0115154	0.0115154	0.0115154	0.0113189	0.0108886	0.010706	0.0104157	0.0101679
Density	(kg/m3)	3.4345	3.4345	3.4345	3.4345	3.4345	3.4345	3.4345	3.4345	3.4345	3.4345
Area	(cm2)	30.2813	30.2452	30.2907	29.7151	30.0662	28.7993	28.5561	30.3068	30.1031	29.9278
Header Velocity	(m/s)	3.80282	3.80735	3.80164	3.87528	3.83003	3.93028	3.81306	3.53253	3.46002	3.39748
Header Dynamic	(kPa)	0.0248339	0.0248931	0.0248186	0.0257893	0.0251906	0.0265266	0.0249678	0.0214291	0.0205585	0.0198221
Air delivery manifold	(mm)	3	3	3	3	3	3	3	3	3	3
Header Dynamic	(kPa)	0.513155	0.51449	0.512809	0.534749	0.521203	0.553299	0.521641	0.442733	0.425268	0.410474
Ratio to Flow Field	(%)	1.71052	1.71497	1.70936	1.7825	1.73734	1.84433	1.7388	1.47578	1.41756	1.36825
W	(cm)	24.225	24.1962	24.2325	23.7721	24.0529	23.0394	22.8448	24.2454	24.0824	23.9422
L	(cm)	29.925	29.8962	29.9325	29.4721	29.7529	28.7394	28.5448	29.9454	29.7824	29.6422
H	(cm)	281.543	222.789	188.671	176.451	162.017	171.085	170.976	146.883	146.814	146.755
Compressor
Inputs
Compressor efficiency		0.6	0.6	0.6	0.6	0.6	0.6	0.6	0.6	0.6	0.6
cp (J/gK)	(J/gK)	1.1	1.1	1.1	1.1	1.1	1.1	1.1	1.1	1.1	1.1
gama		1.4	1.4	1.4	1.4	1.4	1.4	1.4	1.4	1.4	1.4
		0.285714	0.285714	0.285714	0.285714	0.285714	0.285714	0.285714	0.285714	0.285714	0.285714
calcs
O2 max	(mol/s)	0.287984	0.287984	0.287984	0.287984	0.287984	0.283069	0.272308	0.26774	0.260482	0.254285
N2 max	(mol/s)	1.08337	1.08337	1.08337	1.08337	1.08337	1.06488	1.0244	1.00721	0.979908	0.956594
Flow max	(g/s)	39.5498	39.5498	39.5498	39.5498	39.5498	38.8748	37.3969	36.7696	35.7728	34.9218
Compressor max power	(kW)	7.72666	7.72666	7.72666	7.72666	7.72666	7.5948	7.30607	7.18352	6.98878	6.82251
O2 ave	(mol/s)	0.0642803	0.064102	0.063846	0.0634991	0.0639054	0.0633968	0.062114	0.0610358	0.0600605	0.0592721
N2 ave	(mol/s)	0.241816	0.241146	0.240183	0.238878	0.240406	0.238493	0.233667	0.229611	0.225942	0.222976
Flow ave	(g/s)	8.82783	8.80334	8.76818	8.72054	8.77635	8.7065	8.53033	8.38225	8.24831	8.14004
Compressor ave power	(kW)	1.72465	1.71987	1.713	1.70369	1.7146	1.70095	1.66653	1.6376	1.61144	1.59028
Compressor ave energy 5 hours	(kWh)	8.62327	8.59935	8.565	8.51847	8.57298	8.50475	8.33266	8.18802	8.05718	7.95142

## Sheet: Components
Gas utilization componentry for open architecture Li/O2
	L	kg	$
Filter	4	2	15
Compressor, motor, heat tx	15	18	650	3 bar
PSA, valves, piping, plc	38	38	600	3 bar
solvent addition	14	12	70	Assume 10 kg solvent per "annual service" added to battery, system is 4L + 2kg, solvent is 10L + 10kg, $4/kg solvent
solvent capture	15	13	100	must capture 10 kg per year (15,000 miles), for 0.2 kPa vapor pressure (DMSO)
fan for O2 dilution	3	2	10
	L	kg	$
Sum (optimistic)	89	85	1445
	L	kg	$
Compressor, motor, heat tx	30	36	1300	7 bar
PSA, valves, piping, plc	25	25	500	7 bar	10 L beds, 15 L system; monolith adsorbent ~$60, balance is tanks, valves, system, and controls
Compressor, motor, heat tx	15	18	650	3 bar
PSA, valves, piping, plc	38	38	600	3 bar	23 L beds, 15 L system; monolith adsorbent ~$60, balance is tanks, valves, system, and controls

## Sheet: Battery Design
Program for Calculating Performance and Materials Requirements
Li/O2 open architecture system
					Battery 1	Battery 2	Battery 3	Battery 4	Battery 5	Battery 6	Battery 7	Battery 8	Battery 9	Battery 10
Parameters for Finished Cell
Positive Electrode, g		Volume %	Weight %	Density
Active material		60	88.4267	2.31	173.849	173.367	172.675	171.736	172.835	171.46	168.3	164.314	161.913	159.862
Carbon		8	9.31479	1.825	18.3131	18.2623	18.1894	18.0905	18.2063	18.0614	17.7286	17.3087	17.0558	16.8397
Binder		2	2.25852	1.77	4.4403	4.42799	4.4103	4.38634	4.41441	4.37927	4.29858	4.19677	4.13544	4.08304
Open porosity		5	0
Electrolyte		25		1.2	0	0	0	0	0	0	0	0	0	0
Total		100	100	1.5674	196.603	196.057	195.274	194.213	195.456	193.9	190.327	185.82	183.104	180.784
Total minus lithium from active material					144.011	143.612	143.038	142.261	143.171	142.032	139.415	136.113	134.124	132.424
Total minus product (active material)					22.7534	22.6903	22.5997	22.4769	22.6207	22.4407	22.0272	21.5055	21.1912	20.9227
Negative Electrode, g		Volume %	Weight %	Density
Active material			100	0.53	78.8873	78.6685	78.3542	77.9285	78.4272	77.803	76.3694	74.5606	73.471	72.5401
Carbon			0	1.95	0	0	0	0	0	0	0	0	0	0
Binder			0	1.1	0	0	0	0	0	0	0	0	0	0
Void	Vol. %	0			0	0	0	0	0	0	0	0	0	0
Total			100	0.53	78.8873	78.6685	78.3542	77.9285	78.4272	77.803	76.3694	74.5606	73.471	72.5401
Balance of Cell			Thick., mm	Density
Positive foil, m2		Al	20	2.7	4.62357	2.72355	1.67301	1.08871	0.754402	0.606502	0.595205	0.579379	0.570865	0.563587
Negative foil, m2		Cu	8	8.92	2.95627	1.72492	1.06047	0.697562	0.494715	0.402529	0.395572	0.391127	0.385749	0.381152
Separator, m2			20	4	5.12786	2.9507	1.77623	1.13557	0.77672	0.618542	0.607144	0.592764	0.584102	0.576701
Electrolyte , L				1.2	0.0421058	0.0400159	0.0387537	0.0379041	0.0377761	0.0372862	0.0365952	0.0357714	0.0352459	0.034797
Positive terminal assembly, g				5.84141	2.24826	2.24534	2.24902	2.2024	2.23083	2.12821	2.10852	2.25033	2.23382	2.21963
Negative terminal assembly, g					7.42758	7.41794	7.43009	7.27607	7.37001	7.03099	6.96591	7.43441	7.37989	7.33299
Thickness of cell container aluminum layer, µm					100	100	100	100	100	100	100	100	100	100
Thickness of cell container (PET-Al-PP), µm					150	150	150	150	150	150	150	150	150	150
Density of cell container, g/cm3					2.2	2.2	2.2	2.2	2.2	2.2	2.2	2.2	2.2	2.2
Cell container (PET-Al-PP), g					42.2089	41.4344	41.1739	39.5464	40.2925	37.176	36.5675	40.7325	40.1988	39.7424
Cell mass, g					1196.17	827.615	626.866	514.113	455.001	421.872	414.281	410.635	404.784	399.785
Length-to-width ratio for positive electrode					1	1	1	1	1	1	1	1	1	1
Cell thickness, mm					10.8989	8.89089	7.70929	7.32014	6.7987	7.19653	7.19199	6.2081	6.20525	6.20278
Thickness of cell edge from positive electrode to outside of fold, mm					0	0	0	0	0	0	0	0	0	0
Thickness of terminal material, mm					1	1	1	1	1	1	1	1	1	1
Top of positive electrode to top of terminal, mm					0	0	0	0	0	0	0	0	0	0
Cell Capacity Parameters
Positive active material capacity, mAh/g:					1168	1168	1168	1168	1168	1168	1168	1168	1168	1168
Positive electrode capacity, Ah/cm3					1.61885	1.61885	1.61885	1.61885	1.61885	1.61885	1.61885	1.61885	1.61885	1.61885
Negative active material capacity, mAh/g:					3861	3861	3861	3861	3861	3861	3861	3861	3861	3861
Negative electrode capacity, Ah/cm3					2.04633	2.04633	2.04633	2.04633	2.04633	2.04633	2.04633	2.04633	2.04633	2.04633
Negative-to-positive capacity ratio after formation					1.5	1.5	1.5	1.5	1.5	1.5	1.5	1.5	1.5	1.5
Cell Voltage and Resistance Parameters
OCV at full power, V					2.96	2.96	2.96	2.96	2.96	2.96	2.96	2.96	2.96	2.96
Open circuit voltage average for discharge, V					2.96	2.96	2.96	2.96	2.96	2.96	2.96	2.96	2.96	2.96
Electrode system ASI for energy, ohm-cm2					58.52	58.52	58.52	58.52	58.52	58.52	58.52	58.52	58.52	58.52
Excess negative area, %					0	0	0	0	0	0	0	0	0	0
Default maximum allowable electrode coating thickness, mm					200	200	200	200	200	200	200	200	200	200
Cell terminal contact voltage loss, % of cell OCV					0.01	0.01	0.01	0.01	0.01	0.01	0.01	0.01	0.01	0.01
Rate of terminal temperature rise at full power, oC/sec					0.05	0.05	0.05	0.05	0.05	0.05	0.05	0.05	0.05	0.05
Target % OCV at full power					80	80	80	80	80	80	80	80	80	80
% OCV at full power adjusted for thickness limit					80	80	80	80	80	81.2219	84.1425	85.4308	87.6097	89.5383
Battery Input Parameters
Vehicle type (microHEV, HEV-HP, PHEV, EV)					EV	EV	EV	EV	EV	EV	EV	EV	EV	EV
Pack heat transfer fluid (EG-W, CA, CoolA )					EG-W	EG-W	EG-W	EG-W	EG-W	EG-W	EG-W	EG-W	EG-W	EG-W
Duration of power burst (10 or 2), s					10	10	10	10	10	10	10	10	10	10
Battery pack power, kW					87.73	87.73	87.73	87.73	87.73	87.55	87.25	87.1	86.9	86.7
Number of cells per module					30	30	30	30	30	30	30	30	30	30
Number of cells in parallel					2	2	2	2	2	2	2	2	2	2
Number of modules in row					4	4	4	4	4	4	4	4	4	4
Number of rows of modules per pack					2	2	2	2	2	2	2	2	2	2
Number of modules per battery pack					8	8	8	8	8	8	8	8	8	8
Number of modules in parallel					1	1	1	1	1	1	1	1	1	1
Number of packs per vehicle (parallel or series)					1	1	1	1	1	1	1	1	1	1
Parallel packs (P) or series (S)
Cells per battery pack					240	240	240	240	240	240	240	240	240	240
Total cells per battery system					240	240	240	240	240	240	240	240	240	240
Voltage drop for bus bar for packs with one row of modules, V					0.03	0.03	0.03	0.03	0.03	0.03	0.03	0.03	0.03	0.03
Battery pack insulation thickness, mm					10	10	10	10	10	10	10	10	10	10
Battery jacket total thickness, mm					14	14	14	14	14	14	14	14	14	14
Number of batteries manufactured per year					100000	100000	100000	100000	100000	100000	100000	100000	100000	100000
Cell Chemistry Input					355.2	355.2	355.2	355.2	355.2	355.2	355.2	355.2	355.2	355.2
Battery Performance and Design Input
Calculated Cell Parameters
Capacity, Ah
Cell group capacity					406.112	404.985	403.368	401.176	403.743	400.53	393.149	383.838	378.229	373.437
Cell capacity					203.056	202.493	201.684	200.588	201.872	200.265	196.575	191.919	189.114	186.718
ASI Calculation
Limiting current density, mA/cm2					85	85	85	85	85	85	85	85	85	85
Limiting C-rate, A/Ah					100	100	100	100	100	100	100	100	100	100
Electrode system ASI for power at SOC for vehicle type, ohm-cm2					194.372	111.165	66.2752	41.853	28.1168	21.1385	18.0289	16.1562	13.7085	11.4865
Current collector resistance parameter, ohms					0.00784239	0.00786725	0.00786505	0.00783697	0.0077769	0.00774612	0.00774262	0.00770279	0.00770036	0.00769822
Current collector ASI, ohms-cm2					1.60238	1.6037	1.60799	1.54287	1.56686	1.43386	1.40949	1.57647	1.55519	1.53699
Cell terminal and connection ASI, ohms-cm2					0.644726	0.371437	0.223255	0.145521	0.0983616	0.0819244	0.0813448	0.0748947	0.0744688	0.0741054
Resistance of module and pack per module, ohms					8.10567e-05	8.10567e-05	8.10567e-05	8.10567e-05	8.10567e-05	8.2464e-05	8.5723e-05	8.71854e-05	8.96148e-05	9.17988e-05
Resistance of module and pack hardware per cell, ohms					6.75473e-07	6.75473e-07	6.75473e-07	6.75473e-07	6.75473e-07	6.872e-07	7.14358e-07	7.26545e-07	7.4679e-07	7.6499e-07
Total cell hardware and battery ASI, ohm-cm2					2.28175	1.99507	1.84325	1.69607	1.67047	1.52003	1.49517	1.65567	1.63402	1.6155
Total cell ASI for power, ohm-cm2					196.654	113.16	68.1185	43.5491	29.7873	22.6586	19.5241	17.8118	15.3426	13.102
Total cell ASI for energy (C/5 rate), ohm-cm2					423.338	239.633	140.816	86.9395	62.8582	47.3646	39.6191	32.9681	26.6317	21.068
Electrode Coating Thickness Calculation
Negative-to-positive electrode thickness ratio					1.18665	1.18665	1.18665	1.18665	1.18665	1.18665	1.18665	1.18665	1.18665	1.18665
Positive electrode thickness, if at maximum , mm					200	200	200	200	200	200	200	200	200	200
Negative electrode thickness, if at maximum , mm					237.329	237.329	237.329	237.329	237.329	237.329	237.329	237.329	237.329	237.329
Thickest electrode, mm					237.329	237.329	237.329	237.329	237.329	237.329	237.329	237.329	237.329	237.329
Positive electrode thickness parameter, mm					24.461	42.3914	70.1401	109.116	160.548	200	200	200	200	200
Negative electrode thickness parameter, mm					29.0265	50.3036	83.2316	129.482	190.514	237.329	237.329	237.329	237.329	237.329
Positive electrode thickness at adjusted % OCV, mm					24.461	42.3914	70.1401	109.116	160.548	200	200	200	200	200
Negative electrode thickness at adjusted % OCV, mm					29.0265	50.3036	83.2316	129.482	190.514	237.329	237.329	237.329	237.329	237.329
Cell Area Calculation, cm2
Area determined at target % OCV					51278.6	29507	17762.3	11355.7	7767.2	6185.42	6071.44	5927.64	5841.02	5767.01
Area limited by max. allowed electrode thickness,					6271.61	6254.22	6229.24	6195.39	6235.04	6185.42	6071.44	5927.64	5841.02	5767.01
Cell area based on total ASI for power, cm2					51278.6	29507	17762.3	11355.7	7767.2	6185.42	6071.44	5927.64	5841.02	5767.01
Cell Dimensions
Number of bicell layers (97% packing density)					52	30	18	12	8	7	7	6	6	6
Width of positive electrode, mm					222.05	221.762	222.125	217.521	220.329	210.194	208.248	222.254	220.624	219.222
Length of positive electrode, mm					222.05	221.762	222.125	217.521	220.329	210.194	208.248	222.254	220.624	219.222
Length of current collector tabs, mm					18	18	18	18	18	18	18	18	18	18
Width of terminals, mm					55.5126	55.4405	55.5313	54.3802	55.0823	52.5485	52.0621	55.5636	55.1561	54.8056
Length of terminal material, mm					15	15	15	15	15	15	15	15	15	15
Width of cell, mm					234.25	233.762	234.125	229.521	232.329	222.194	220.248	234.254	232.624	231.222
Length of cell, mm					250.05	249.762	250.125	245.521	248.329	238.194	236.248	250.254	248.624	247.222
Thickness of cell, mm					10.8989	8.89089	7.70929	7.32014	6.7987	7.19653	7.19199	6.2081	6.20525	6.20278
Volume of cell, cm3					638.399	519.093	451.461	412.505	392.245	380.879	374.223	363.939	358.888	354.571
Module Parameters
Module capacity, Ah					406.112	404.985	403.368	401.176	403.743	400.53	393.149	383.838	378.229	373.437
Mass of each cell group interconnect (copper), g					8.09528	6.5952	5.72807	5.32618	5.01065	5.05987	5.00988	4.61536	4.57941	4.54849
Module state-of-charge regulator assembly, g					120	120	120	120	120	120	120	120	120	120
Terminal heating factor, W/g					0.019274	0.019274	0.019274	0.019274	0.019274	0.019274	0.019274	0.019274	0.019274	0.019274
Terminal resistance factor, A-ohms/cm					0.000535294	0.000535294	0.000535294	0.000535294	0.000535294	0.000535294	0.000535294	0.000535294	0.000535294	0.000535294
Module terminals, if more than one module (each 2.0-cm long), g					41.1573	41.1573	41.1573	41.1573	41.1573	40.455	38.917	38.2642	37.2269	36.3412
Module terminal resistance both terminals, ohms					6.93534e-06	6.93534e-06	6.93534e-06	6.93534e-06	6.93534e-06	7.05574e-06	7.33459e-06	7.45971e-06	7.66757e-06	7.85444e-06
Module resistance , ohms					0.000614861	0.000614861	0.000614861	0.000614861	0.000614861	0.000625536	0.000650257	0.00066135	0.000679778	0.000696345
Module wall material					aluminum	aluminum	aluminum	aluminum	aluminum	aluminum	aluminum	aluminum	aluminum	aluminum
Module wall thickness, mm					0.5	0.5	0.5	0.5	0.5	0.5	0.5	0.5	0.5	0.5
Length of cooling fin mm					222.05	221.762	222.125	217.521	220.329	210.194	208.248	222.254	220.624	219.222
Thickness of cooling fin, mm					1	1	1	1	1	1	1	1	1	1
Total mass of cooling fin, g					1062.3	1058.73	1062.1	1019.8	1045.5	954.266	937.229	1063.3	1048.22	1035.33
Balance of module materials, g					659.088	572.68	523.584	494.76	480.268	470.421	465.192	460.171	455.985	452.396
Module length, mm					252.05	251.762	252.125	247.521	250.329	240.194	238.248	252.254	250.624	249.222
Module width, mm					354.367	292.117	255.488	243.424	227.26	239.592	239.452	208.951	208.863	208.786
Module height, mm					255.25	254.762	255.125	250.521	253.329	243.194	241.248	255.254	253.624	252.222
Module volume, L					22.7985	18.7362	16.4339	15.0945	14.4118	13.9955	13.763	13.4542	13.2763	13.1242
Module mass, kg					37.8901	26.7209	20.6397	17.18	15.4131	14.3182	14.0659	14.071	13.8746	13.7068
Calculated Battery Pack Parameters
Battery pack capacity, Ah					406.112	404.985	403.368	401.176	403.743	400.53	393.149	383.838	378.229	373.437
Total battery pack energy storage, kWh					127.912	127.867	127.797	127.712	127.579	127.527	127.543	126.506	126.52	126.531
Useable battery energy storage, kWh					100.177	100.201	100.235	100.282	100.227	100.295	100.467	99.762	99.8928	99.9986
OCV at full power, V					355.2	355.2	355.2	355.2	355.2	355.2	355.2	355.2	355.2	355.2
Nominal battery voltage (OCV at 50% SOC)					355.2	355.2	355.2	355.2	355.2	355.2	355.2	355.2	355.2	355.2
Battery power at target % OCV and SOC, kW					87.73	87.73	87.73	87.73	87.73	91.8441	104.625	111.966	128.087	148.091
Maximum current at full power, A					308.735	308.735	308.735	308.735	308.735	303.466	291.929	287.032	279.251	272.607
Maximum current density at full power, mA/cm2					3.01037	5.23154	8.69074	13.5939	19.8742	24.5308	24.0412	24.2113	23.9043	23.635
C-rate at full power, A/Ah					0.760221	0.762335	0.765392	0.769574	0.76468	0.757661	0.742539	0.747795	0.738312	0.729996
Coolant space above and below modules, mm					0	0	0	0	0	0	0	0	0	0
Thickness of module compression plates (steel), mm					1.5	1.5	1.5	1.5	1.5	1.5	1.5	1.5	1.5	1.5
Battery pack length (A dimension), mm					1448.47	1199.47	1052.95	1004.7	940.039	989.37	988.807	866.805	866.452	866.144
Battery pack width (B dimension), mm					542.1	541.524	542.25	533.041	538.659	518.388	514.497	542.509	539.249	536.445
Battery pack height (C dimension), mm					283.25	282.762	283.125	278.521	281.329	271.194	269.248	283.254	281.624	280.222
Length of pack extensions for air cooled packs, mm					50	50	50	50	50	50	50	50	50	50
Thickness of pack extensions for air-cooled packs, mm					0	0	0	0	0	0	0	0	0	0
Total volume of pack extensions for air-cooled packs, L					0	0	0	0	0	0	0	0	0	0
Pack integration unit (BMS & disconnects), L					4	4	4	4	4	4	4	4	4	4
Volume of battery pack and integration unit, L					226.413	187.666	165.654	153.16	146.454	143.089	140.977	137.2	135.584	134.202
Mass of each module inter-connect (5-cm long), g					51.4467	51.4467	51.4467	51.4467	51.4467	50.5687	48.6462	47.8303	46.5336	45.4265
Mass of module compression plates and steel straps, g					3070.65	3061.34	3070.04	2960.65	3027.14	2790.67	2746.38	3073.14	3034.17	3000.84
Mass of bus bar for packs with one row of modules, g					0	0	0	0	0	0	0	0	0	0
Resistance of module interconnects if more than one module, ohms					7.2821e-05	7.2821e-05	7.2821e-05	7.2821e-05	7.2821e-05	7.40853e-05	7.70132e-05	7.8327e-05	8.05095e-05	8.24716e-05
Resistance of battery pack terminals					1.0403e-05	1.0403e-05	1.0403e-05	1.0403e-05	1.0403e-05	1.05836e-05	1.10019e-05	1.11896e-05	1.15014e-05	1.17817e-05
Power of battery heaters, kW					3	3	3	3	3	3	3	3	3	3
Mass of battery pack heaters (0.1 kg/kW), kg					0.3	0.3	0.3	0.3	0.3	0.3	0.3	0.3	0.3	0.3
Battery coolant mass within jacket, kg					13.5621	11.7504	10.7191	10.11	9.80764	9.5936	9.48255	9.38689	9.29768	9.22122
Battery jacket mass parameter, g/cm2					1.112	1.112	1.112	1.112	1.112	1.112	1.112	1.112	1.112	1.112
Total mass of pack extensions for air-cooled packs, kg					0	0	0	0	0	0	0	0	0	0
Battery jacket mass, kg					32.1336	27.6715	25.1192	23.7415	22.9205	22.6513	22.4097	21.7991	21.6109	21.4495
Pack integration unit (BMS & disconnects, ave. density = 1.0), kg					4	4	4	4	4	4	4	4	4	4
Mass of battery pack and integration unit, kg					352.817	257.189	204.956	175.291	160.033	150.791	148.419	147.754	145.906	144.325
Battery volume (all packs), L					226.413	187.666	165.654	153.16	146.454	143.089	140.977	137.2	135.584	134.202
Battery mass (all packs), kg					352.817	257.189	204.956	175.291	160.033	150.791	148.419	147.754	145.906	144.325
Battery Gas Delivery System
Gas cleanup, L					89	89	89	89	89	89	89	89	89	89
Gas cleanup, kg					85	85	85	85	85	85	85	85	85	85
Total system, L					315.413	276.666	254.654	242.16	235.454	232.089	229.977	226.2	224.584	223.202
Total system, kg					437.817	342.189	289.956	260.291	245.033	235.791	233.419	232.754	230.906	229.325
Vehicle Electric Range
Energy requirement of vehicle on UDDS cycle (default = 250), Wh/mile					300	300	300	300	300	300	300	300	300	300
Energy requirement of battery pack, Wh/mile					300	300	300	300	300	300	300	300	300	300
Available battery energy, % of total					85	85	85	85	85	85	85	85	85	85
Vehicle electric range, miles					362.417	362.29	362.093	361.849	361.475	361.326	361.372	358.434	358.473	358.505
Pack Capacity Calculation
Select capacity, battery energy, or vehicle range, but only one.
Pack capacity (Ah)
Pack energy (kWh)					128	128	128	128	128	128	128	127	127	127
Vehicle range (miles)
Capacity estimating parameter					406.112	404.985	403.368	401.176	403.743	400.53	393.149	383.838	378.229	373.437
Capacity at C/3, Ah					406.112	404.985	403.368	401.176	403.743	400.53	393.149	383.838	378.229	373.437
Capacity holding					406.112	404.985	403.368	401.176	403.743	400.53	393.149	383.838	378.229	373.437
Positive electrode thickness					24.461	42.3914	70.1401	109.116	160.548	200	200	200	200	200
Convergence parameter					0.3	0.3	0.3	0.3	0.3	0.3	0.3	0.3	0.3	0.3
				Restart (0/1)	0	0	0	0	0	0	0	0	0	0
				Battery System Values
				Power, kW	87.73	87.73	87.73	87.73	87.73	87.55	87.25	87.1	86.9	86.7
				Total energy, kWh	127.912	127.867	127.797	127.712	127.579	127.527	127.543	126.506	126.52	126.531
				Useable energy, kWh	100.177	100.201	100.235	100.282	100.227	100.295	100.467	99.762	99.8928	99.9986
				Loading, mAh/cm2	3.95986	6.86252	11.3546	17.6641	25.9903	32.377	32.377	32.377	32.377	32.377
				Area, m2	1230.69	708.168	426.294	272.536	186.413	148.45	145.715	142.263	140.184	138.408
			Pack	Mass, kg	352.817	257.189	204.956	175.291	160.033	150.791	148.419	147.754	145.906	144.325
			Pack	Volume, L	226.413	187.666	165.654	153.16	146.454	143.089	140.977	137.2	135.584	134.202
			Pack	Wh/kg	283.934	389.599	489.056	572.085	626.289	665.13	676.915	675.19	684.639	692.869
			Pack	Wh/L	442.452	533.932	605.085	654.748	684.359	700.927	712.651	727.127	736.758	745.134
			Pack	$/kWh	123.272	99.8135	86.7597	79.3218	75.467	73.241	72.3066	71.8723	71.1731	70.5808
				Estimated Total Battery Cost to OEM, US$	12349	10001.4	8696.36	7954.52	7563.83	7345.72	7264.45	7170.12	7109.68	7057.98
			System	Mass, kg	437.817	342.189	289.956	260.291	245.033	235.791	233.419	232.754	230.906	229.325
			System	Volume, L	315.413	276.666	254.654	242.16	235.454	232.089	229.977	226.2	224.584	223.202
			System	Wh/kg	228.81	292.822	345.69	385.266	409.035	425.357	430.415	428.616	432.613	436.055
			System	Wh/L	317.605	362.172	393.612	414.112	425.676	432.141	436.858	441.034	444.79	448.018
		w/o catalyst	System	$/kWh	137.697	114.235	101.176	93.7313	89.8843	87.6485	86.6893	86.3568	85.6386	85.031
		with catalyst	System	$/kWh	170.981	147.511	134.441	126.981	123.152	120.326	118.071	117.43	115.83	114.473
			System	kg_charge	408.715	313.168	261.051	231.543	216.101	207.089	205.247	205.248	203.802	202.565
			System	Wh/kg_charge	245.102	319.958	383.967	433.101	463.797	484.311	489.496	486.055	490.146	493.662
		A/mg cat	1	g_cat total	74.0963	74.0963	74.0963	74.0963	74.0963	72.8318	70.0629	68.8877	67.0202	65.4257

## Sheet: Summary of Results
Summary of Results
Li/O2 open architecture system
					Battery 1	Battery 2	Battery 3	Battery 4	Battery 5	Battery 6	Battery 7	Battery 8	Battery 9	Battery 10
Calculated Battery Parameters
Vehicle electric range, miles					362.417	362.29	362.093	361.849	361.475	361.326	361.372	358.434	358.473	358.505
Number of battery packs					1	1	1	1	1	1	1	1	1	1
Packs in series or parallel
Number of cells per pack					240	240	240	240	240	240	240	240	240	240
Battery system total energy storage, kWh					127.912	127.867	127.797	127.712	127.579	127.527	127.543	126.506	126.52	126.531
Cell capacity, Ah					203.056	202.493	201.684	200.588	201.872	200.265	196.575	191.919	189.114	186.718
Cell group capacity, Ah					406.112	404.985	403.368	401.176	403.743	400.53	393.149	383.838	378.229	373.437
Module capacity, Ah					406.112	404.985	403.368	401.176	403.743	400.53	393.149	383.838	378.229	373.437
Pack capacity, Ah					406.112	404.985	403.368	401.176	403.743	400.53	393.149	383.838	378.229	373.437
Battery system capacity, Ah					406.112	404.985	403.368	401.176	403.743	400.53	393.149	383.838	378.229	373.437
Nominal battery system voltage (OCV at 50% SOC),V					355.2	355.2	355.2	355.2	355.2	355.2	355.2	355.2	355.2	355.2
Battery system power at target % OCV, kW					87.73	87.73	87.73	87.73	87.73	91.8441	104.625	111.966	128.087	148.091
Required battery system power, kW					87.73	87.73	87.73	87.73	87.73	87.55	87.25	87.1	86.9	86.7
Target % OCV at full power					80	80	80	80	80	80	80	80	80	80
% OCV at full power adjusted for thickness limit					80	80	80	80	80	81.2219	84.1425	85.4308	87.6097	89.5383
Battery system volume (all packs), L					226.413	187.666	165.654	153.16	146.454	143.089	140.977	137.2	135.584	134.202
Battery system mass (all packs), kg					352.817	257.189	204.956	175.291	160.033	150.791	148.419	147.754	145.906	144.325
Investment Costs
Capital equipment cost including installation, mil$					464.662	433.941	413.794	400.596	392.601	388.022	386.646	384.571	383.501	382.58
Building, Land and Utilities
Area, m2					53903.2	48569.1	45162.8	42987.5	41634.7	40930.3	40804.6	40602.5	40505	40421.1
Cost, $/m2					3000	3000	3000	3000	3000	3000	3000	3000	3000	3000
Building investment, mil$					161.71	145.707	135.489	128.963	124.904	122.791	122.414	121.808	121.515	121.263
Launch Costs
Rate: 5% of direct annual materials + 10% of other annual costs
Total, million$					49.3657	38.7689	32.9147	29.6071	27.8753	26.9115	26.5512	26.14	25.8728	25.6443
Working capital (15% of annual variable costs), mil$					139.147	108.119	91.066	81.4832	76.51	73.734	72.6687	71.4605	70.6708	69.9957
Total investment, mil$					814.885	726.536	673.264	640.649	621.891	611.458	608.28	603.979	601.56	599.483
Unit Cost of Battery Pack, $
Variable Cost
Materials and Purchased Items
Cell materials					7280.69	5300.23	4219.68	3619.35	3304.79	3138.4	3082.57	3013.46	2970.95	2934.62
Cell purchased Items					160.093	159.658	159.532	158.442	158.972	156.827	156.41	159.297	158.934	158.623
Module					934.407	928.734	924.448	919.522	922.423	916.161	906.633	897.802	890.511	884.282
Battery pack					304.652	273.398	255.55	245.687	240.073	237.518	233.306	229.502	227.815	226.369
Total					8679.84	6662.02	5559.21	4943	4626.26	4448.91	4378.92	4300.06	4248.21	4203.9
Direct Labor at		18	$/hour
Electrode processing					109.856	82.2168	63.5622	51.0723	42.7399	38.5047	38.1236	37.6382	37.3432	37.0896
Cell assembly					59.2349	59.0687	58.9518	58.8717	58.8172	58.7897	58.7875	58.7849	58.7832	58.7818
Formation cycling, testing and sealing					39.3147	39.3147	39.3147	39.3147	39.3147	39.3147	39.3147	39.3147	39.3147	39.3147
Module and battery assembly					31.104	31.104	31.104	31.104	31.104	31.104	31.104	31.104	31.104	31.104
Cell and materials rejection and recycling					17.1008	17.1008	17.1008	17.1008	17.1008	17.1008	17.1008	17.1008	17.1008	17.1008
Receiving and shipping					27.4912	27.4912	27.4912	27.4912	27.4912	27.4912	27.4912	27.3896	27.3896	27.3896
Control laboratory					19.891	19.891	19.891	19.891	19.891	19.891	19.891	19.8131	19.8131	19.8131
Total					303.992	276.187	257.416	244.846	236.459	232.196	231.813	231.145	230.849	230.594
Variable Overhead					292.655	269.693	254.447	244.366	237.941	234.498	233.849	232.829	232.325	231.89
Total Variable Cost					9276.49	7207.9	6071.07	5432.21	5100.66	4915.6	4844.58	4764.04	4711.39	4666.38
Fixed Expenses
General, Sales, Administration					362.985	335.492	317.316	305.338	297.797	293.698	292.82	291.457	290.775	290.187
Research and Development					342.117	318.435	302.961	292.856	286.715	283.239	282.247	280.742	279.97	279.306
Depreciation					855.292	796.089	757.402	732.141	716.788	708.099	705.617	701.855	699.926	698.265
Total Fixed Expenses					1560.39	1450.02	1377.68	1330.34	1301.3	1285.04	1280.68	1274.06	1270.67	1267.76
Profits after taxes					407.442	363.268	336.632	320.324	310.945	305.729	304.14	301.99	300.78	299.742
Total unit cost per pack not including warranty, $					11244.3	9021.19	7785.38	7082.88	6712.91	6506.37	6429.4	6340.08	6282.84	6233.88
Summary of Unit Costs, $
Materials					7280.69	5300.23	4219.68	3619.35	3304.79	3138.4	3082.57	3013.46	2970.95	2934.62
Purchased Items					1399.15	1361.79	1339.53	1323.65	1321.47	1310.51	1296.35	1286.6	1277.26	1269.27
Direct Labor					303.992	276.187	257.416	244.846	236.459	232.196	231.813	231.145	230.849	230.594
Variable Overhead					292.655	269.693	254.447	244.366	237.941	234.498	233.849	232.829	232.325	231.89
General, Sales, Administration					362.985	335.492	317.316	305.338	297.797	293.698	292.82	291.457	290.775	290.187
Research and Development					342.117	318.435	302.961	292.856	286.715	283.239	282.247	280.742	279.97	279.306
Depreciation					855.292	796.089	757.402	732.141	716.788	708.099	705.617	701.855	699.926	698.265
Profit					407.442	363.268	336.632	320.324	310.945	305.729	304.14	301.99	300.78	299.742
Warranty (includes battery pack(s) only)					629.682	505.187	435.981	396.641	375.923	364.357	360.047	355.044	351.839	349.097
Price to OEM for battery pack, $					11874	9526.38	8221.36	7479.52	7088.83	6870.72	6789.45	6695.12	6634.68	6582.98
Pack integration (BMS & Disconnects), $/pack					475	475	475	475	475	475	475	475	475	475
Gas delivery, $					1445	1445	1445	1445	1445	1445	1445	1445	1445	1445
Total battery cost to OEM, $					13794	11446.4	10141.4	9399.52	9008.83	8790.72	8709.45	8615.12	8554.68	8502.98
Error bars on price to OEM for battery pack, %
Potential positive error, %					20	20	20	20	20	20	20	20	20	20
Potential negative error, %					10	10	10	10	10	10	10	10	10	10
Total system price					3.95986	6.86252	11.3546	17.6641	25.9903	32.377	32.377	32.377	32.377	32.377
Pack integration					475	475	475	475	475	475	475	475	475	475
Gas delivery					1445	1445	1445	1445	1445	1445	1445	1445	1445	1445
Purchased Items					1399.15	1361.79	1339.53	1323.65	1321.47	1310.51	1296.35	1286.6	1277.26	1269.27
Non-materials					3194.17	2864.35	2662.15	2536.51	2462.57	2421.82	2410.53	2395.06	2386.46	2379.08
Materials					7280.69	5300.23	4219.68	3619.35	3304.79	3138.4	3082.57	3013.46	2970.95	2934.62
			Cathode		33.2845	33.2766	33.2652	33.2497	33.2678	32.6778	31.3817	31.0734	30.1915	29.442
			Anode		20.9568	20.8965	20.8101	20.6931	20.8302	20.6586	20.262	19.9459	19.6431	19.3861
			Inactive materials		51.7217	31.9997	21.2877	15.3988	12.1429	10.633	10.4203	10.2606	10.0983	9.96055
			Purchased Items		13.9668	13.5906	13.3639	13.1993	13.1848	13.0665	12.9032	12.8967	12.7863	12.6929
			Pack integration		4.74162	4.74049	4.73886	4.73666	4.73924	4.73602	4.7279	4.76133	4.7551	4.75007
			Non-materials		31.8853	28.5861	26.5591	25.2939	24.5699	24.1469	23.9932	24.0078	23.8902	23.7912
			Gas utilization		14.4245	14.4211	14.4161	14.4094	14.4173	14.4075	14.3828	14.4845	14.4655	14.4502

## Sheet: Cost Input
Cost Input
Materials Yields During Processing					Cost inputs that vary with cell chemistry
Cell yield, %				95	Cost inputs that are do not vary with chemistry
Materials yield per accepted cell, %					Material		Electrode	Cell	Electrolyte
					Mixing	Coating	Slitting	Stacking	Filling
Positive electrode material (dry)				92.2	99	95	99	99
Negative electrode material (dry)				92.2	99	95	99	99
Positive current collector (aluminum foil)				90.2		99	92	99
Negative current collector (copper foil)				90.2		99	92	99
Separators				98				98
Electrolyte				94					94
Binder solvent recovery, %				99.5
Unit Cell Materials Cost					Baseline Manufacturing Rates
Positive Electrode, $/kg				p	Number of batteries manufactured per year				100000
Active Material			0	0.95	Effective full days of operation per year				300
Carbon			50	1	Number of 8-hr shifts per day (2 for shipping and receiving)				3
					Number of annual 8-h shifts				900
Binder PVDF			10	1	Energy, kWh per year				869416
Binder Solvent (NMP)			3.2	1	Number of accepted cells per year				6000000
Negative electrode material, $/kg					Number of cells adjusted for yield				6.31579e+06
Active Material			100	0.95	Electrode area, m2 per year				8.20904e+06
Carbon Black			6.8	1	Positive active material, kg per year				1.71252e+06
Binder			10	1	Negative active material, kg per year				1.20589e+06
Binder Solvent			0	1	Positive binder solvent evaporated, kg per year				2.30902e+06
Positive current collector foil, $/m2			0.8	1	Negative binder solvent evaporated, kg per year				1.5271e+06
Negative current collector foil, $/m2			1.8	1	Dry room, enclosed operating area, m2				3000
Separators, $/m2			2	1
Electrolyte, $/L			21.6	1
Unit Cell Hardware Costs					Cost Rates for Manufacturing
		Baseline			Investment Costs
		Cost per	Plus Cost		Cost of building (including land and utilities), $/m2				3000
		Mass, $/kg	per Cell, $	p	Launch Cost rates
Positive terminal		4	0.25	0.8	Percent of direct annual materials and purch.items cost, %				5
Negative terminal		6	0.25	0.8	Percent of direct labor plus variable overhead, %				10
Cell Container		3	0.2	0.8	Working capital, percent of annual variable cost, %				15
Alum. heat conductor		4	0.1	0.8	Unit Cost of Battery Pack
(or thermal group enclosure)					Variable Cost
Module Purchased Materials Cost					Direct labor rate, $/hr				18
State-of-charge regulator and safety monitors					Variable overhead rate
Cost per cell, $				2.5	% of direct labor				40
Plus cost per capacity, $/Ah				0.01	% of depreciation				20
Module terminals					Fixed Expenses
Cost per mass, $/kg				5	General, Sales, Administration rates
Plus cost per module, $				0.75	Percent of direct labor plus variable overhead, %				25
Balance of module materials					Percent of depreciation, %				25
Cost per mass, $/kg				3	Research and Development rate, % of depreciation				40
Plus cost per module, $				1	Depreciation rates
Battery Purchased Materials Cost					Percent of capital equipment investment (6-year rate), %				16.6667
Module Inter-connectors and signal wiring					Percent of building investment (20-year rate), %				5
Cost per mass, $/kg				5	Profits After Taxes, % of investment				5
Plus cost per interconnect, $				1	Warranty Cost, % added to price				5.6
Module compression plates and steel straps, $,kg				2	Battery Pack Integration System
Battery terminals									PHEV
Cost per battery, $				15			MicroHEV	HEV-HP	and EV
Plus cost per capacity, $/A (rounded up)				0.02	Current and voltage sensing, $		40	70	100
Bus bar for packs with one row of modules or					Module controls, $/module		10	10	20
multiple modules or packs in parallel, $ each				20	Auto. battery disconnect, $		50	70	200
Battery Jacket					Manual disconnect per pack, $		15	15	15
Cost per battery jacket weight, $/kg				7	Additional for parallel modules and packs, $ per string				100
Plus cost per battery, $				30	Thermal Controls				PHEV
Multipliers for Overhead to Basic Costs							MicroHEV	HEV-HP	and EV
Basic Cost Factors				Multiplier	Baseline thermal system*, $		30	80	120
Materials and purchased items, $/pack				1.06656	Additions to AC system**, $/kW		40	40	40
Direct labor, $/pack				1.86648	Heating system**, $/kW/pack		20	20	20
Capital equipment (100K packs/yr*)				3.8764	Additional for multiple packs, $/additional pack				100
Building, land, utilities (100K packs/yr*)				1.53252	*$60 additional for each added pack
*For other production rates multiply by 100,000/rate					**No charge for cabin air cooling
Battery Assembly Costs
			Baseline					Baseline
Operation			Plant	p	Operation			Plant	p
Receiving					Cell Assembly in Dry Room
Pertinent volume: energy/year					Cell stacking
Direct Labor, hours/year			14400	0.4	Pertinent volume: number of cells/year
Capital Equipment, million$			3.6	0.6	Baseline Cell Capacity, Ah			40	0.3
Plant Area, square meters			900	0.5	Direct Labor, hours/year			36000	0.7
Electrode Processing					Capital Equipment, million$			4	0.8
Materials preparation and delivery to coating					Plant Area, square meters			600	0.8
Positive materials					Current collector welding
Pertinent volume: positive active mass/year					Pertinent volume: number of cells/year
Direct Labor, hours/year			14400	0.5	Direct Labor, hours/year			36000	0.7
Capital Equipment, million$			2	0.7	Capital Equipment, million$			4	0.8
Plant Area, square meters			600	0.6	Plant Area, square meters			600	0.8
Negative materials					Inserting cell in container
Pertinent volume: negative active mass/year					Pertinent volume: number of cells/year
Direct Labor, hours/year			14400	0.5	Direct Labor, hours/year			21600	0.5
Capital Equipment, million$			2	0.7	Capital Equipment, million$			3	0.7
Plant Area, square meters			600	0.6	Plant Area, square meters			600	0.6
Electrode coating					Electrolyte filling, and cell sealing
Positive materials					Pertinent volume: number of cells/year
Pertinent volume: cell area/year					Direct Labor, hours/year			36000	0.5
Solvent evaporated, kg/m2yr			0.281278		Capital Equipment, million$			5	0.7
Direct Labor, hours/year			28800	0.5	Plant Area, square meters			900	0.6
Capital Equipment, million$			8	0.8	Dry room airlocks and management
Plant Area, square meters			750	0.8	Pertinent volume: dry room operating area, sq. meters
Negative materials					Direct Labor, hours/year			14400	0.4
Pertinent volume: cell area/year					Capital Equipment, million$			20	0.6
Solvent evaporated, kg/m2yr			0.186027		Plant Area, square meters			100	0.4
Direct Labor, hours/year			28800	0.5	Formation Cycling
Capital Equipment, million$			8	0.8	Pertinent volume: number of cells/year
Plant Area, square meters			750	0.8	Baseline Cell Capacity, Ah			40	0.3
Solvent recovery					Direct Labor, hours/year			57600	0.7
Pertinent volume: NMP mass/year					Capital Equipment, million$			30	0.8
Direct Labor, hours/year			14400	0.4	Plant Area, square meters			2200	0.8
Capital Equipment, million$			3	0.6	Final Cell sealing
Plant Area, square meters			225	0.6	Pertinent volume: number of cells/year
Calendering					Direct Labor, hours/year			14400	0.5
Positive materials					Capital Equipment, million$			2	0.7
Pertinent volume: cell area/year					Plant Area, square meters			450	0.6
Direct Labor, hours/year			14400	0.5	Charge-Retention Testing
Capital Equipment, million$			1	0.7	Pertinent volume: number of cells/year
Plant Area, square meters			225	0.6	Direct Labor, hours/year			21600	0.4
Negative materials					Capital Equipment, million$			4.75	0.7
Pertinent volume: cell area/year					Plant Area, square meters			900	0.6
Direct Labor, hours/year			7200	0.5	Module Assembly
Capital Equipment, million$			1	0.7	Pertinent volume: number of cells/year
Plant Area, square meters			225	0.6	Direct Labor, hours/year			43200	0.5
Inter-process Materials Handling					Capital Equipment, million$			6	0.7
Pertinent volume: cell area/year					Plant Area, square meters			600	0.6
Direct Labor, hours/year			28800	0.7	Battery Pack Assembly and Testing
Capital Equipment, million$			1.5	0.7	Pertinent volume: number of cells/year
Plant Area, square meters			900	0.6	Number of modules per pack			4	0.3
Electrode Slitting (positive and negative)					Direct Labor, hours/year			43200	0.5
Pertinent volume: cell area/year					Capital Equipment, million$			6	0.7
Direct Labor, hours/year			28800	0.5	Plant Area, square meters			900	0.6
Capital Equipment, million$			2	0.7	Rejected Cell and Scrap Recycle
Plant Area, square meters			300	0.6	Pertinent volume: number of cells/year
Vacuum Drying of Electrodes					Direct Labor, hours/year			36000	0.7
Pertinent volume: cell area/year					Capital Equipment, million$			2.5	0.7
Direct Labor, hours/year			14400	0.5	Plant Area, square meters			600	0.6
Capital Equipment, million$			1.6	0.7	Shipping
Plant Area, square meters			300	0.6	Pertinent volume: energy/year
Control Laboratory					Direct Labor, hours/year			28800	0.5
Pertinent volume: energy/year					Capital Equipment, million$			5	0.7
Direct Labor, hours/year			28800	0.5	Plant Area, square meters			900	0.6
Capital Equipment, million$			1.5	0.7
Plant Area, square meters			300	0.6
Baseeline Plant Summary
Total Direct Labor, hours/year			626400
Total Capital Equipment, million$			127.45
Total Plant Area, square meters			15425

[truncated: 2 more sheets: Manufacturing Cost Calculations, Cost Breakdown]
